# Supplementary material for: Diastereoselective synthesis of spiro[cyclopropane-1,3′-indolin]-2′-ones through metal-free cyclopropanation using tosylhydrazone salts
Source: Royal Society of Chemistry journal article supplement (doi:10.1039/c4ra05755d), 2014-01-01

Crystallographic data for compound **3g** ( AW71)

X-ray data for the compound were collected at room temperature using a Bruker Smart Apex CCD diffractometer with graphite monochromated MoK $\alpha$  radiation ( $\lambda=0.71073\text{\AA}$ ) with  $\omega$ -scan method.<sup>1</sup> Preliminary lattice parameters and orientation matrices were obtained from four sets of frames. Unit cell dimensions were determined using 9047 reflections for AW71 data. Integration and scaling of intensity data were accomplished using SAINT program.<sup>1</sup> The structures were solved by Direct Methods using SHELXS97<sup>2</sup> and refinement was carried out by full-matrix least-squares technique using SHELXL97.<sup>2</sup> Anisotropic displacement parameters were included for all non-hydrogen atoms. All H atoms were positioned geometrically and treated as riding on their parent C atoms, with C-H distances of 0.93--0.97  $\text{\AA}$ , and with  $U_{\text{iso}}(\text{H}) = 1.2U_{\text{eq}}(\text{C})$  or  $1.5U_{\text{eq}}$  for methyl atoms.

Crystal data for compound **3g** (AW71):  $\text{C}_{12}\text{H}_{18}\text{N}_2\text{O}_5$ ,  $M = 414.30$ , yellow block,  $0.41 \times 0.26 \times 0.15 \text{ mm}^3$ , monoclinic, space group  $P2_1/n$  (No. 14),  $a = 10.2802(8)$ ,  $b = 11.3015(9)$ ,  $c = 18.0590(14) \text{ \AA}$ ,  $\beta = 104.2340(10)^\circ$ ,  $V = 2033.7(3) \text{ \AA}^3$ ,  $Z = 4$ ,  $D_c = 1.353 \text{ g/cm}^3$ ,  $F_{000} = 864$ , CCD area detector, MoK $\alpha$  radiation,  $\lambda = 0.71073 \text{ \AA}$ ,  $T = 293(2)\text{K}$ ,  $2\theta_{\text{max}} = 50.0^\circ$ , 18960 reflections collected, 3579 unique ( $R_{\text{int}} = 0.0255$ ), Final  $Goof = 1.025$ ,  $R1 = 0.0377$ ,  $wR2 = 0.1000$ ,  $R$  indices based on 3164 reflections with  $I > 2\sigma(I)$  (refinement on  $F^2$ ), 285 parameters,  $\mu = 0.096 \text{ mm}^{-1}$ . CCDC 1016218 contains supplementary crystallographic data. These data can be obtained free of charge at [www.ccdc.cam.ac.uk/conts/retrieving.html](http://www.ccdc.cam.ac.uk/conts/retrieving.html) or from the Cambridge Crystallographic Data Centre (CCDC), 12 Union Road, Cambridge CB2 1EZ, UK; fax: +44(0) 1223 336 033; email: [deposit@ccdc.cam.ac.uk](mailto:deposit@ccdc.cam.ac.uk).

1. SMART & SAINT. Software Reference manuals. Versions 6.28a & 5.625, Bruker Analytical X-ray Systems Inc., Madison, Wisconsin, U.S.A., 2001.
2. Sheldrick, G. M. SHELXS97 and SHELXL97, Programs for crystal structure solution and refinement; University of Gottingen: Germany, 1997.

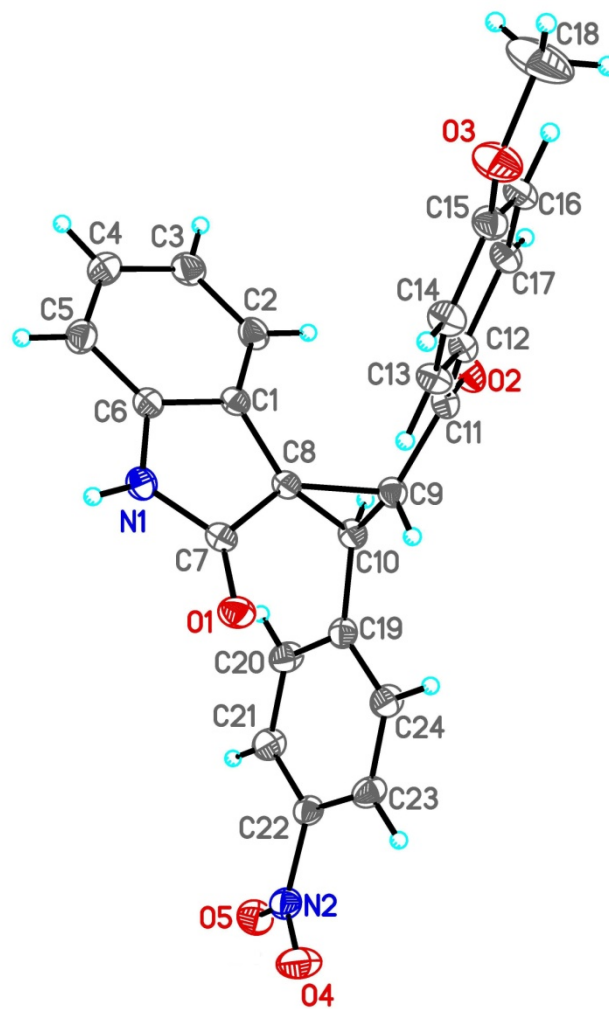

Figure caption: The molecular structure of compound **3g** (AW71) with the atom-numbering scheme. Displacement ellipsoids are drawn at the 20% probability level and H atoms are shown as small spheres of arbitrary radius.

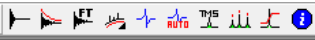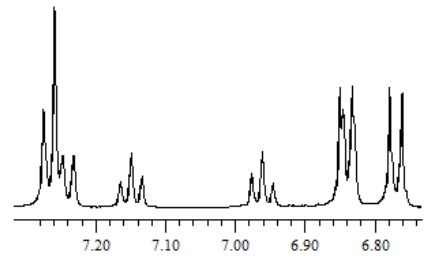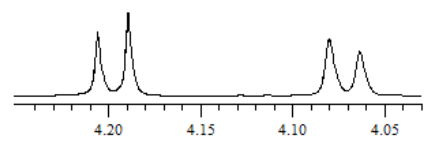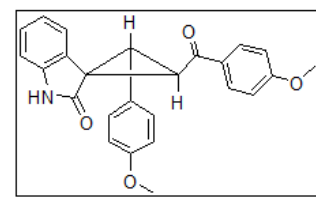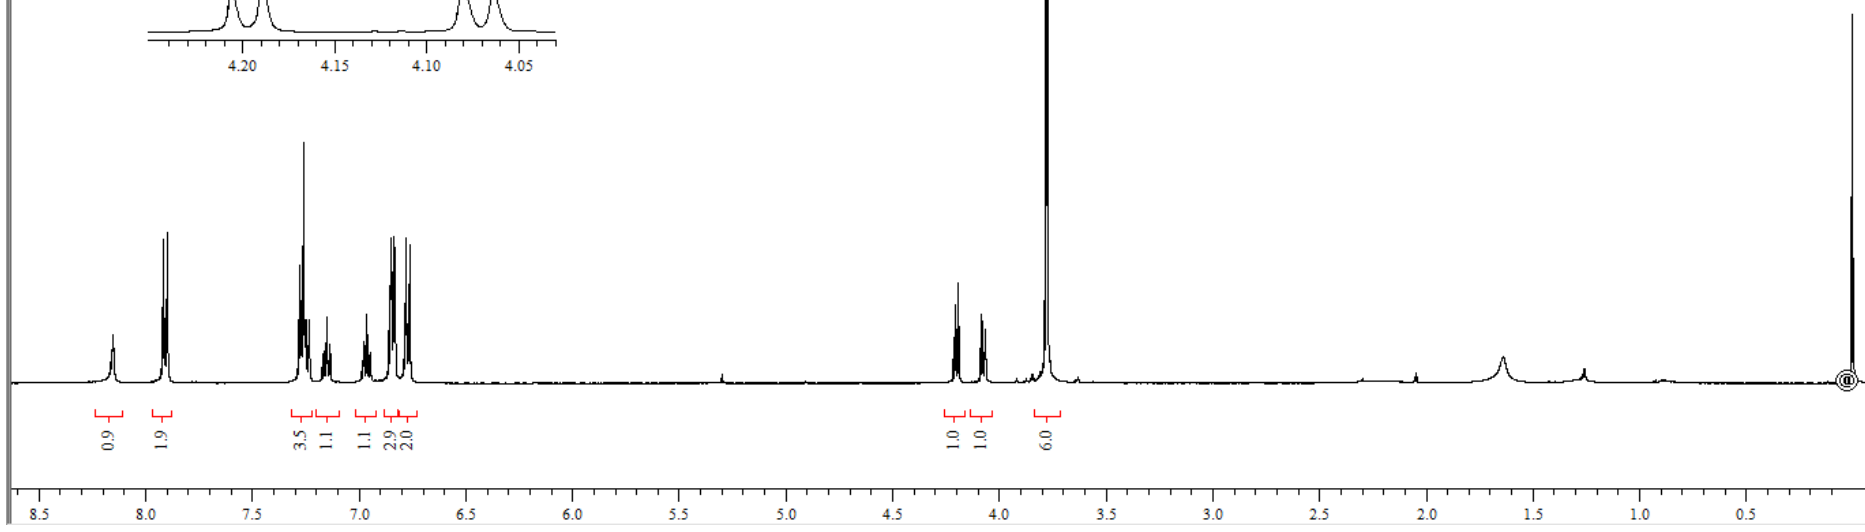

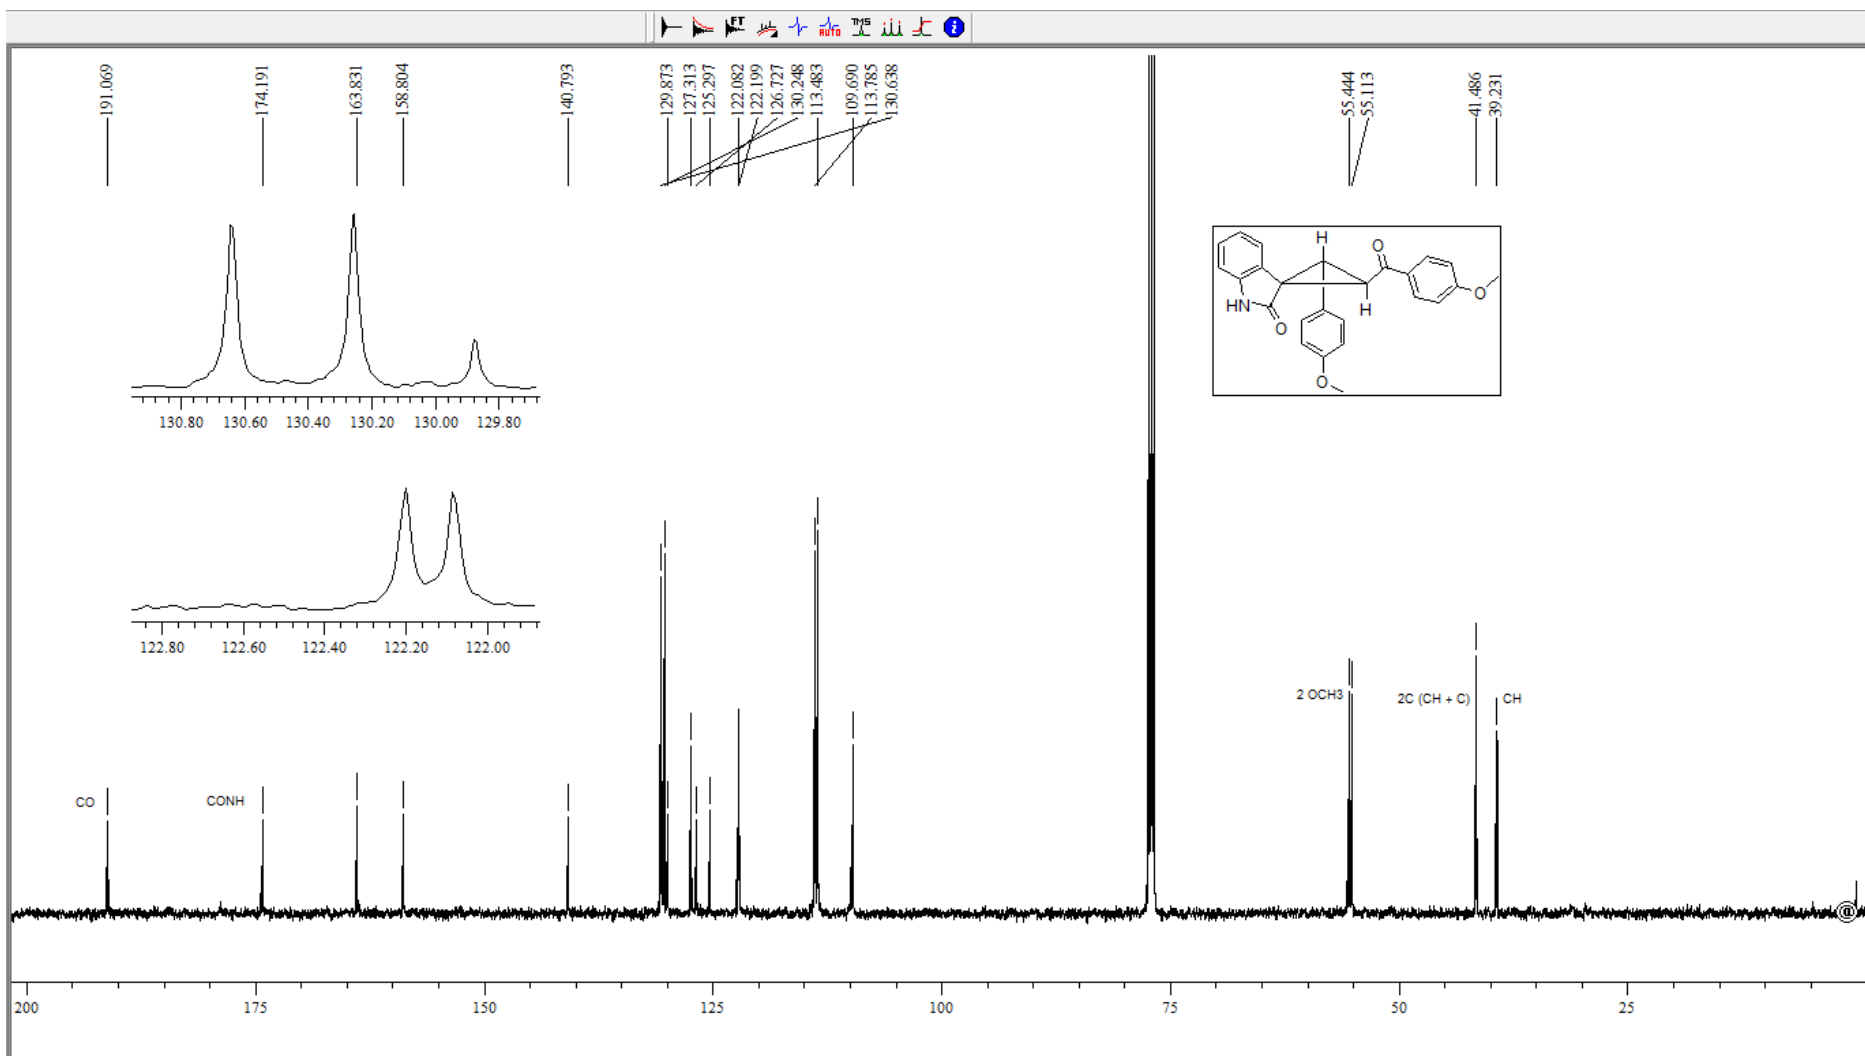

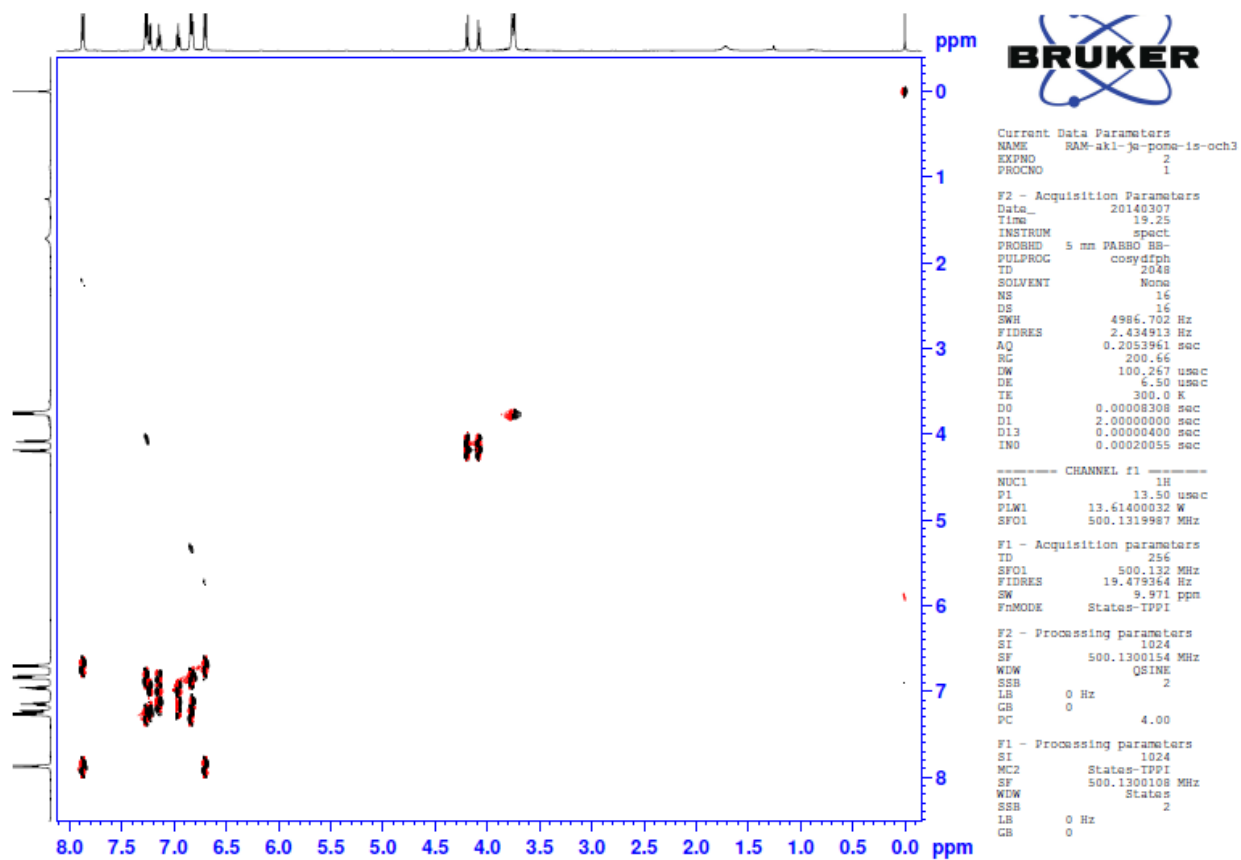

2D DQFCOSY (Double Quantum Filter Correlation spectroscopy) Spectrum of compound **3a** recorded on 500 MHz spectrometer.

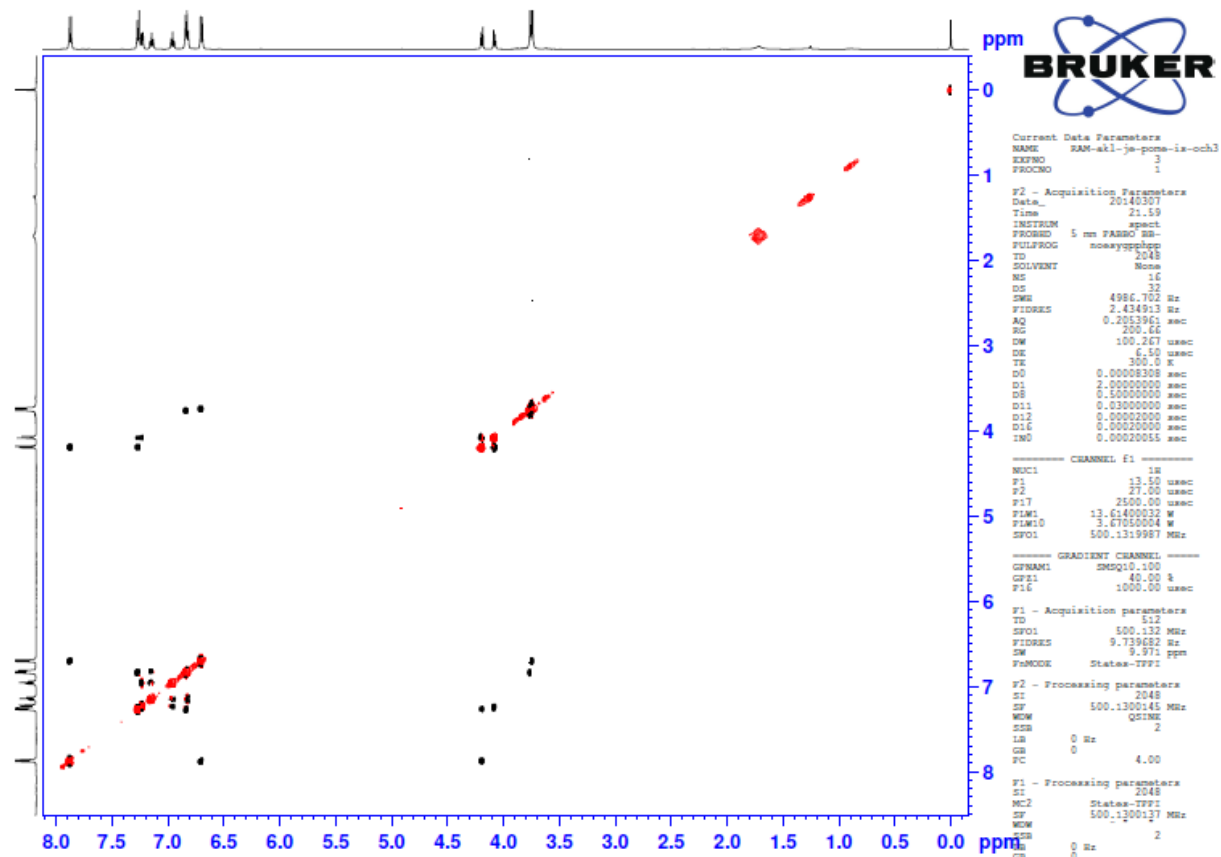

2D NOESY Spectrum of compound **3a** recorded on 500 MHz spectrometer.

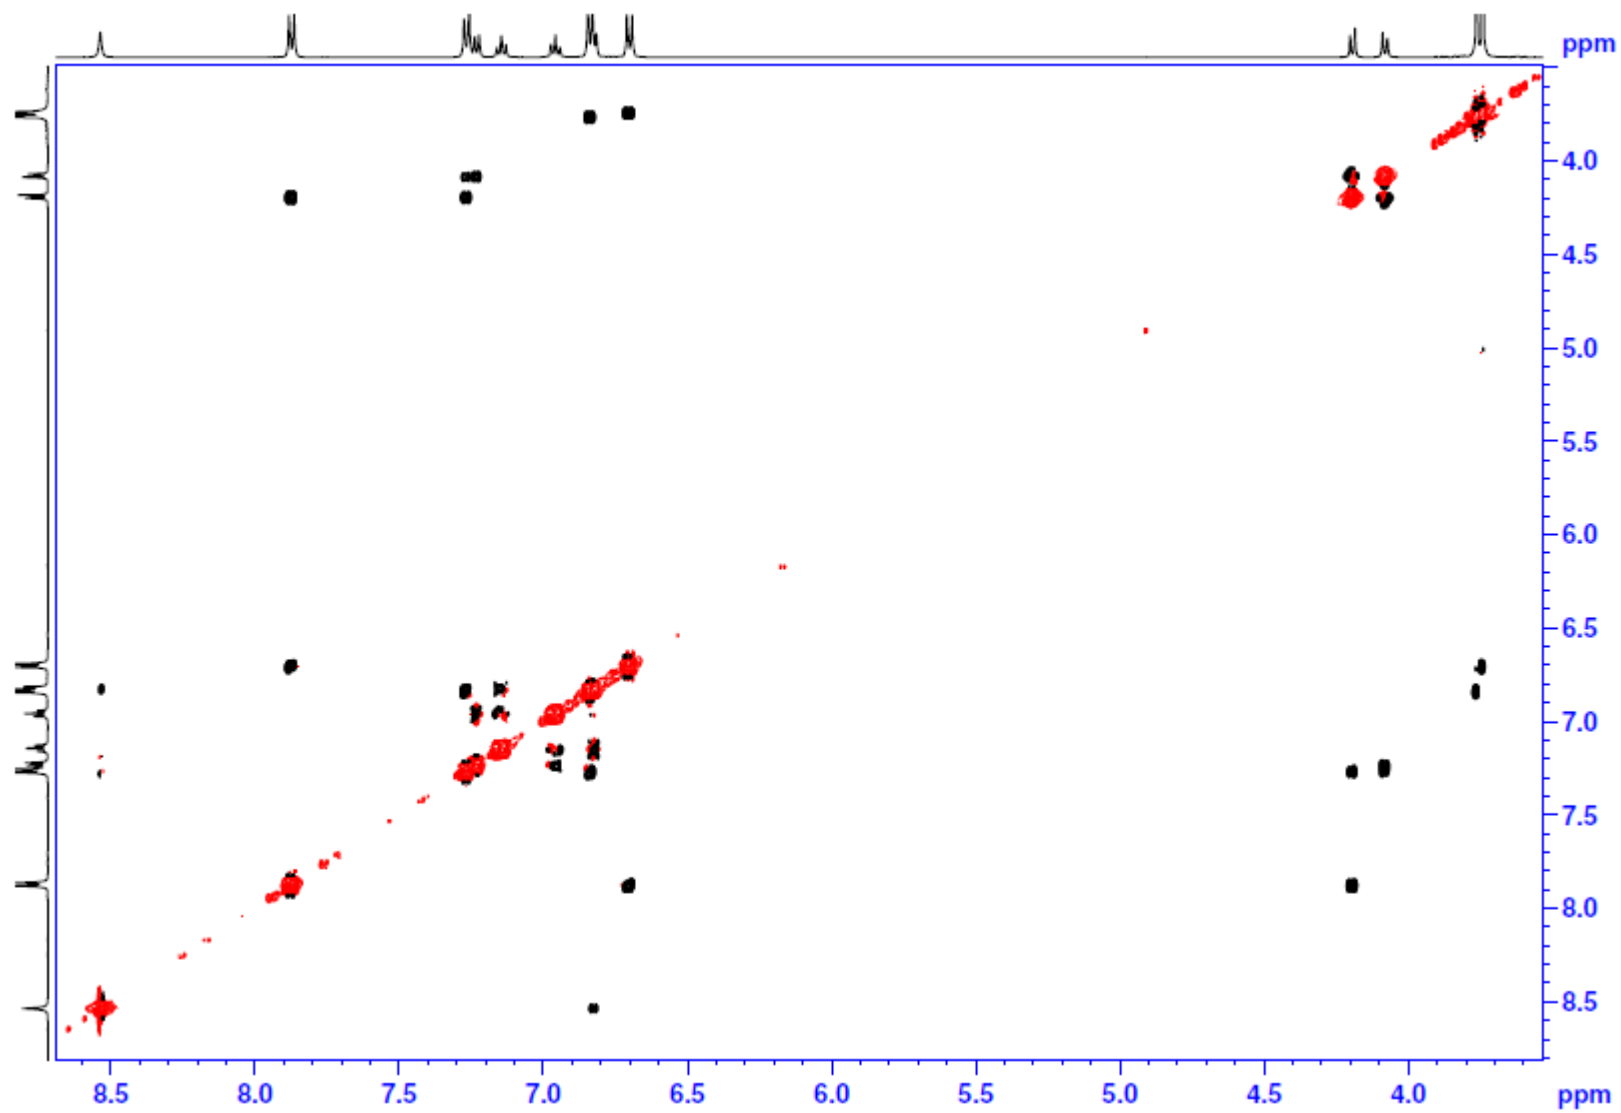

2D NOESY Spectrum of compound 3a: Expansion-1

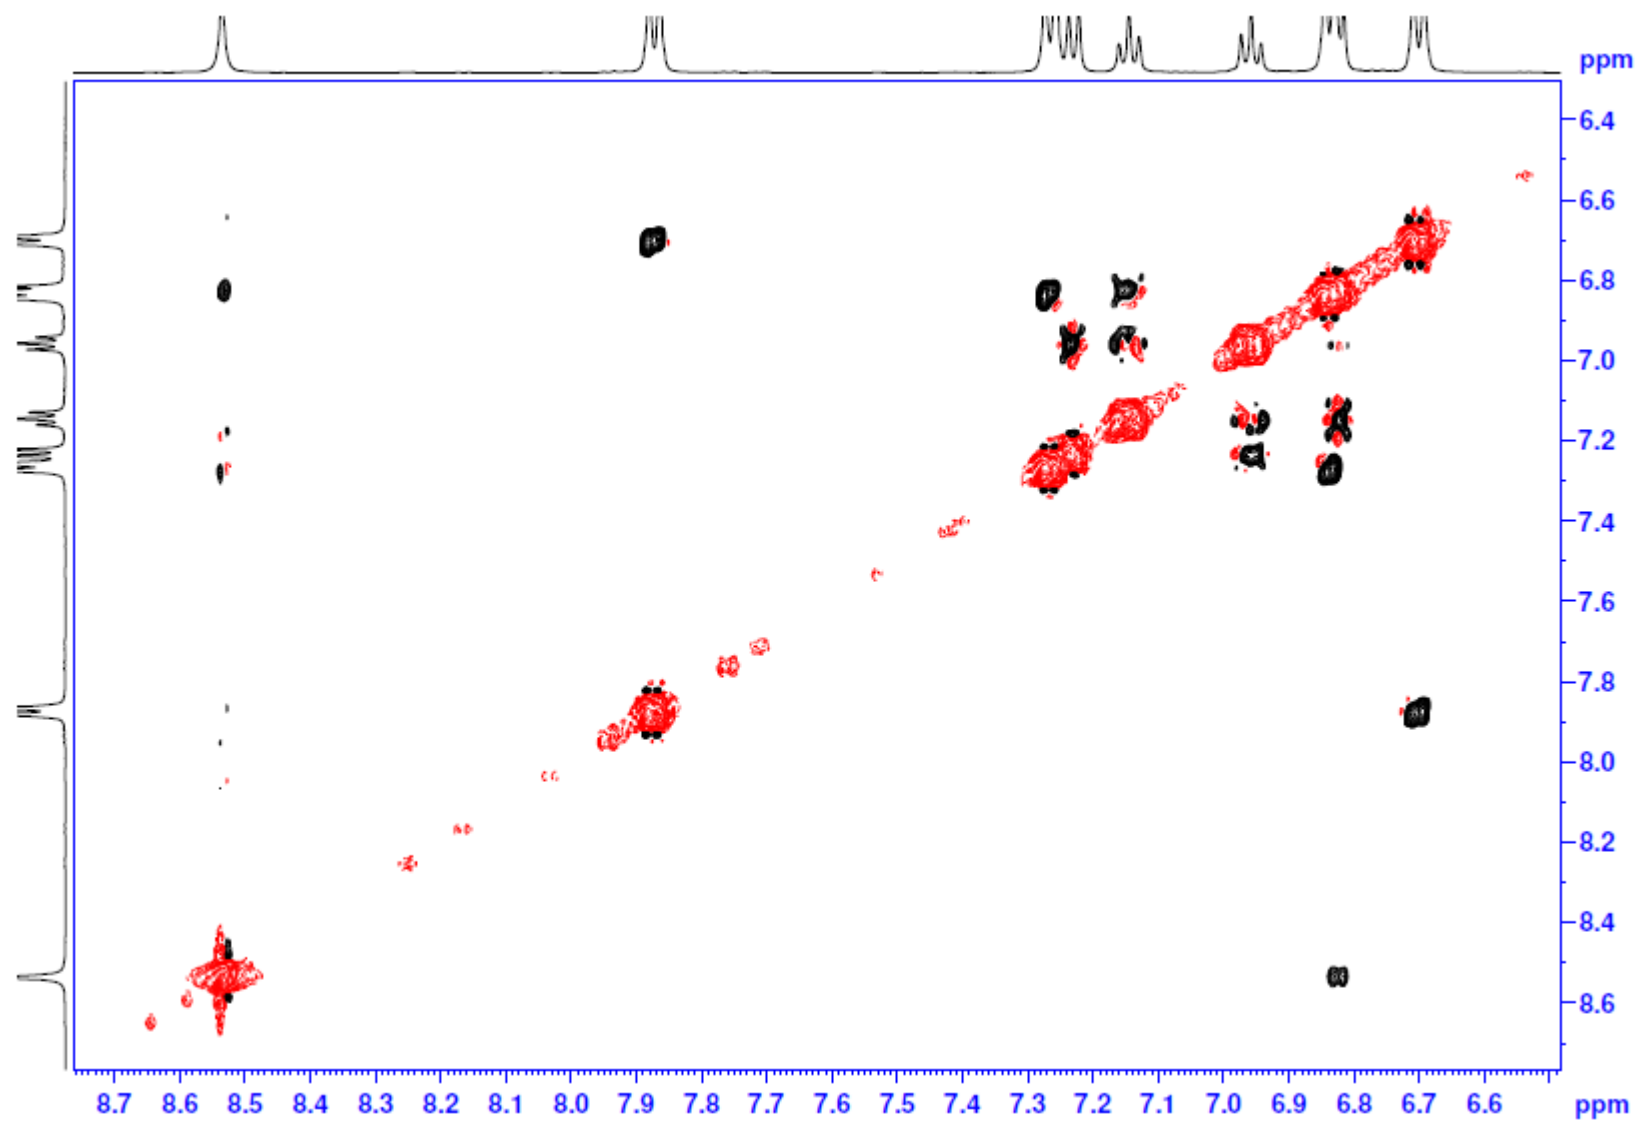



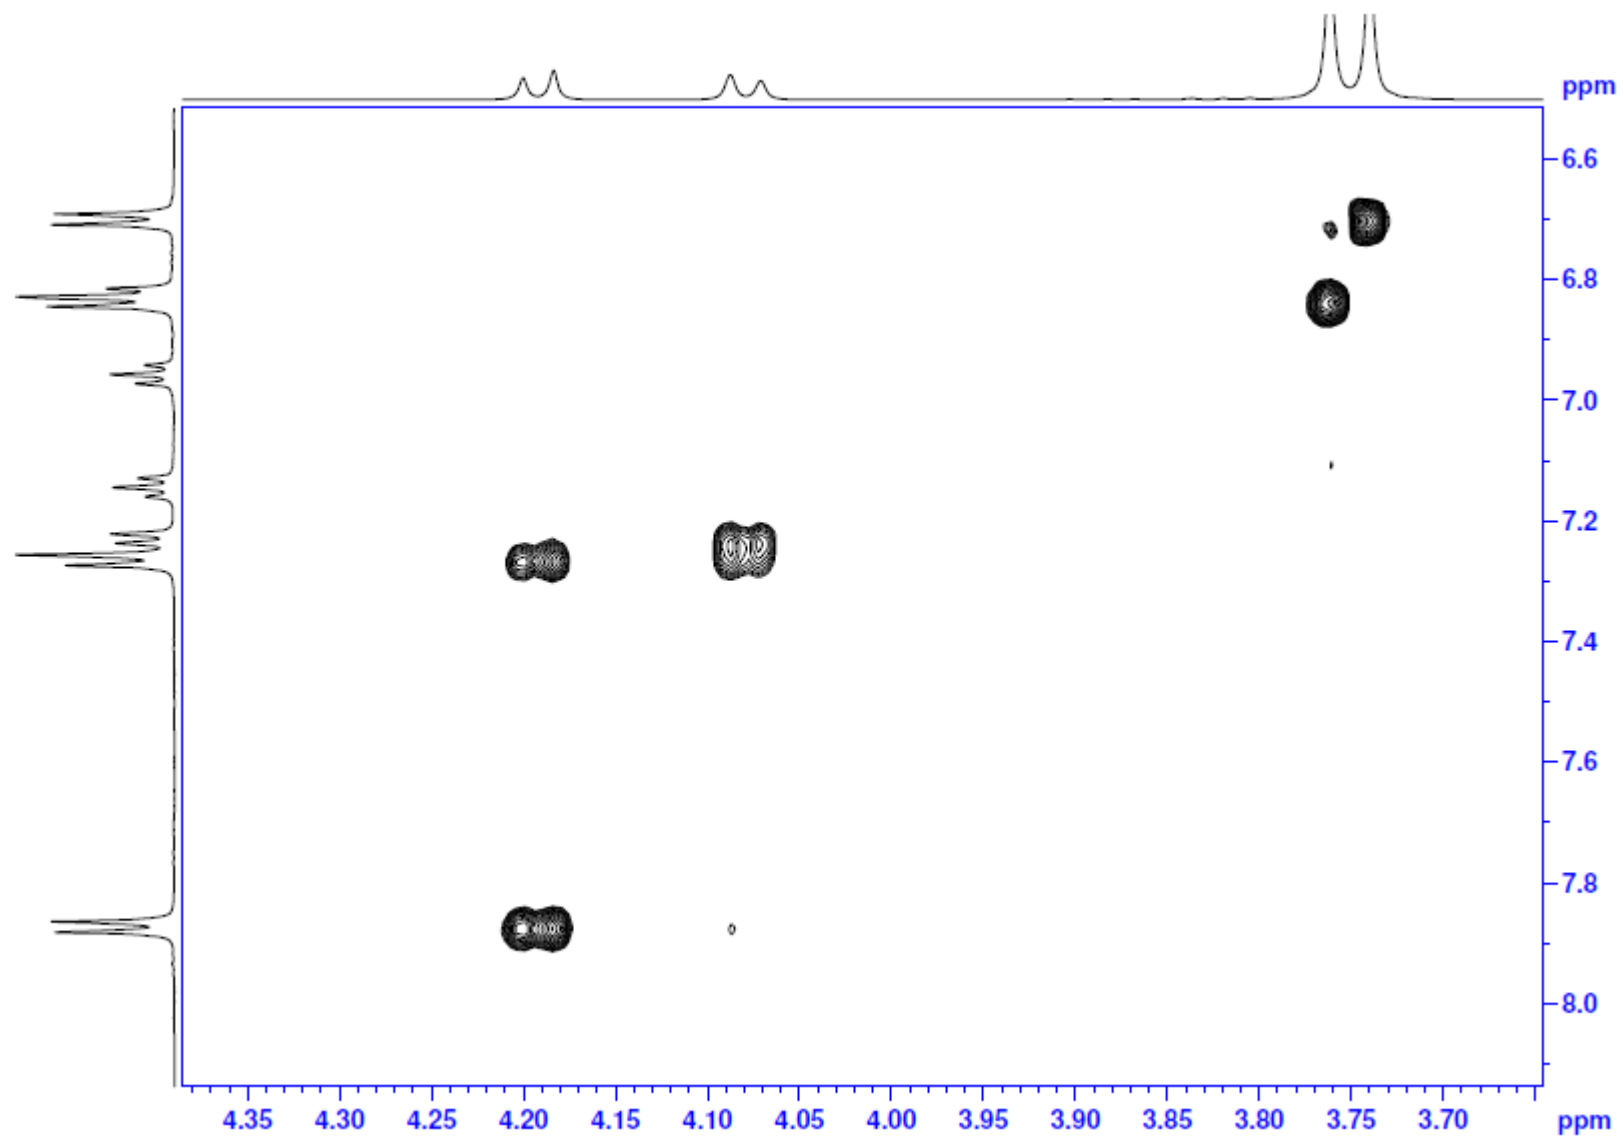

2D NOESY Spectrum of compound 3a: Expansion-3

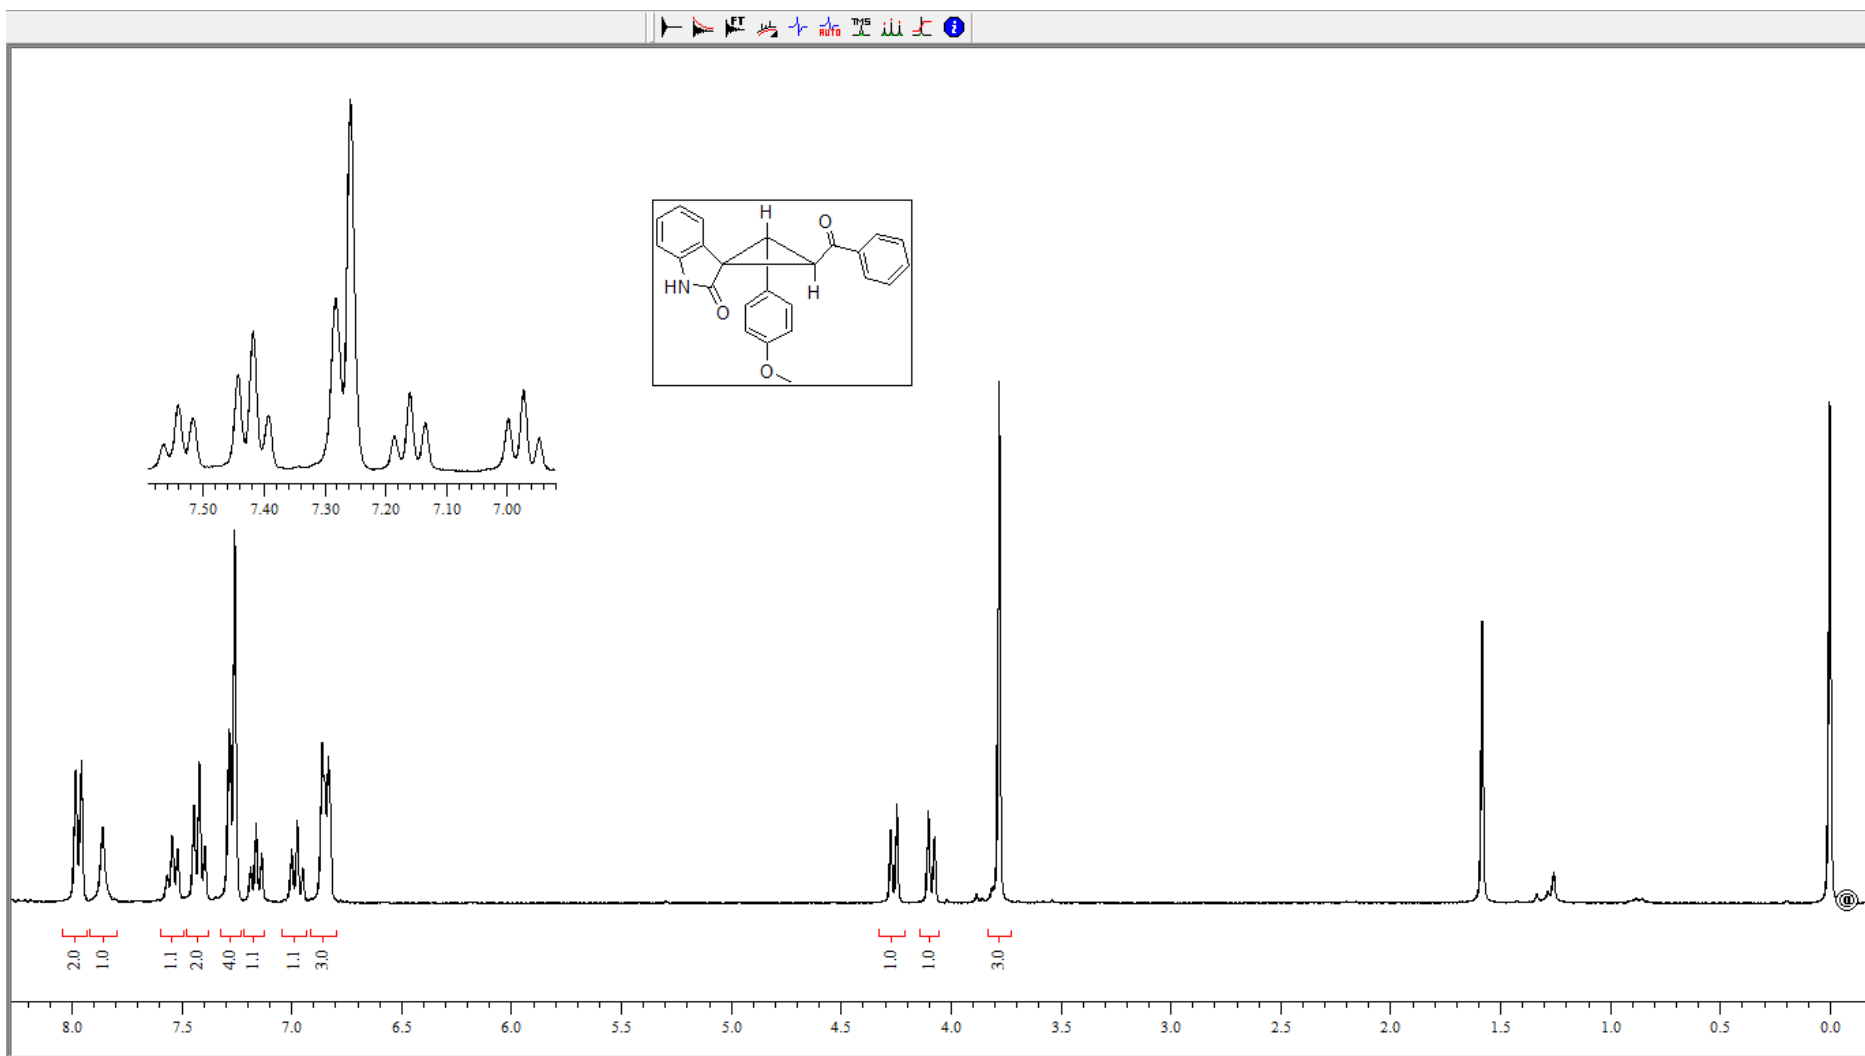

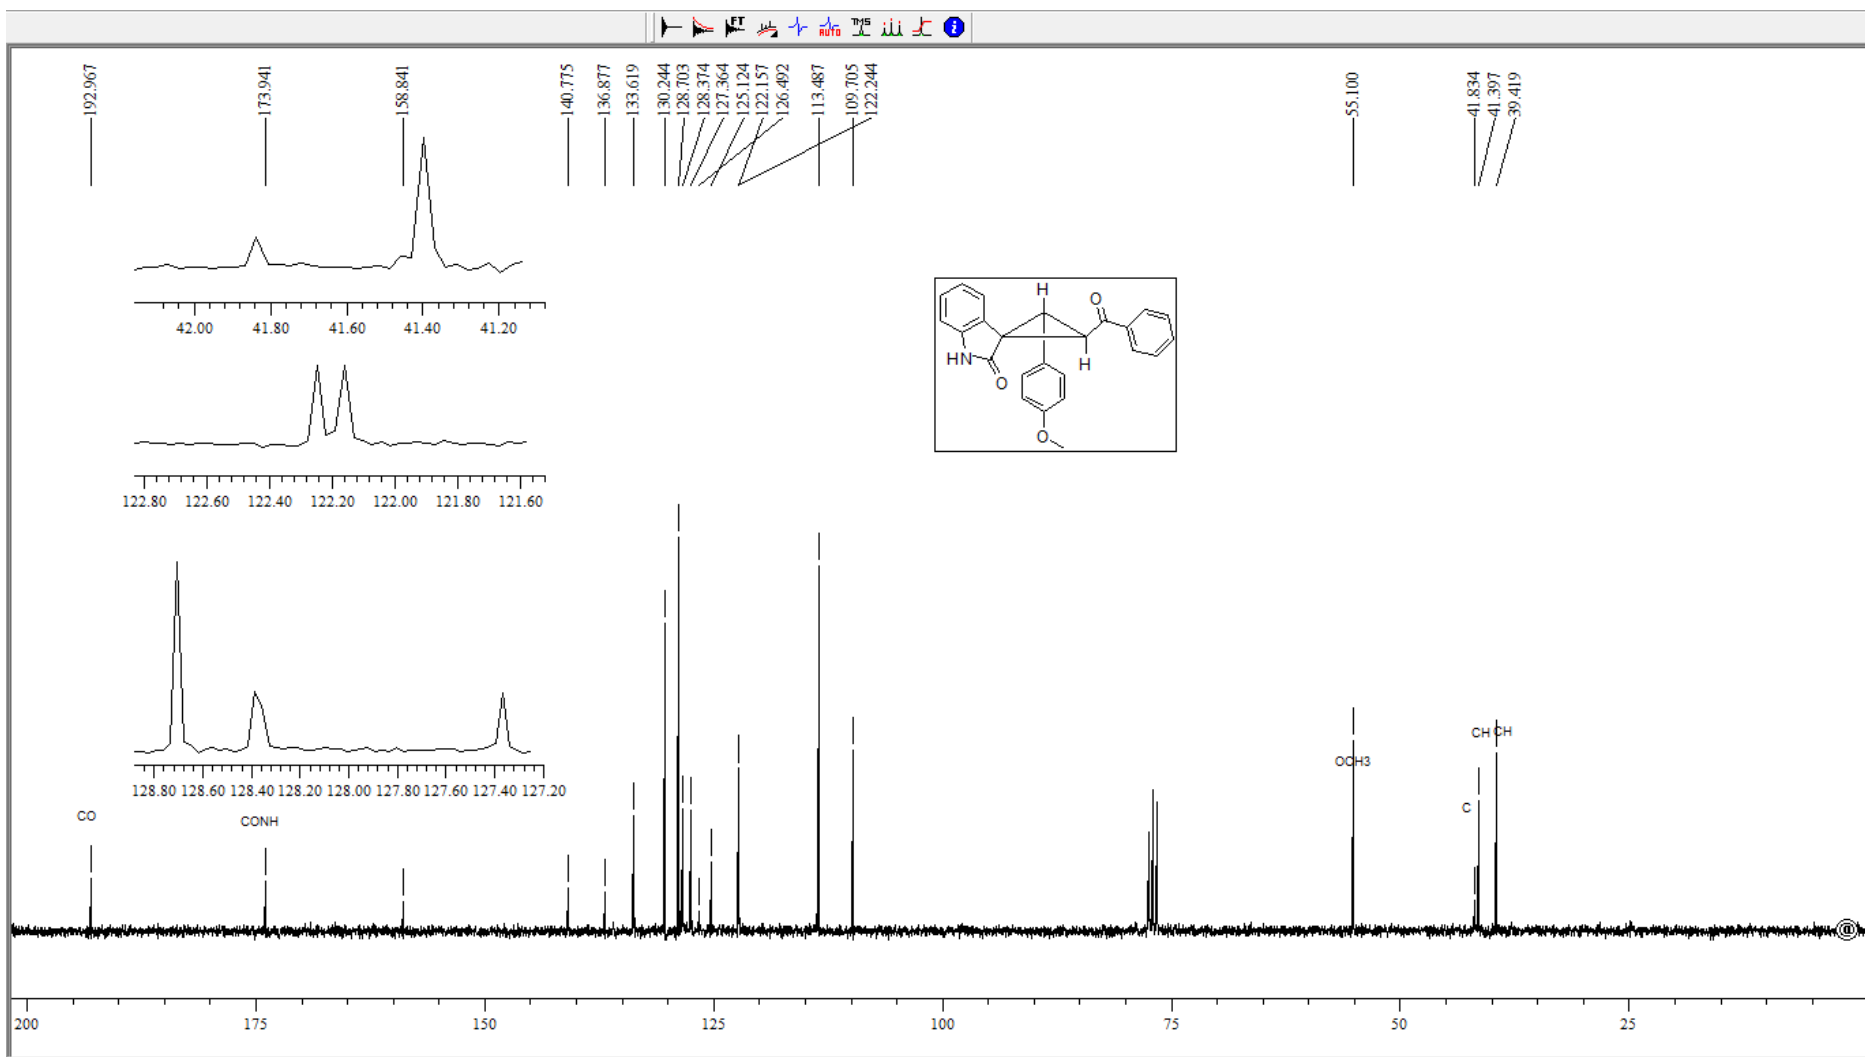

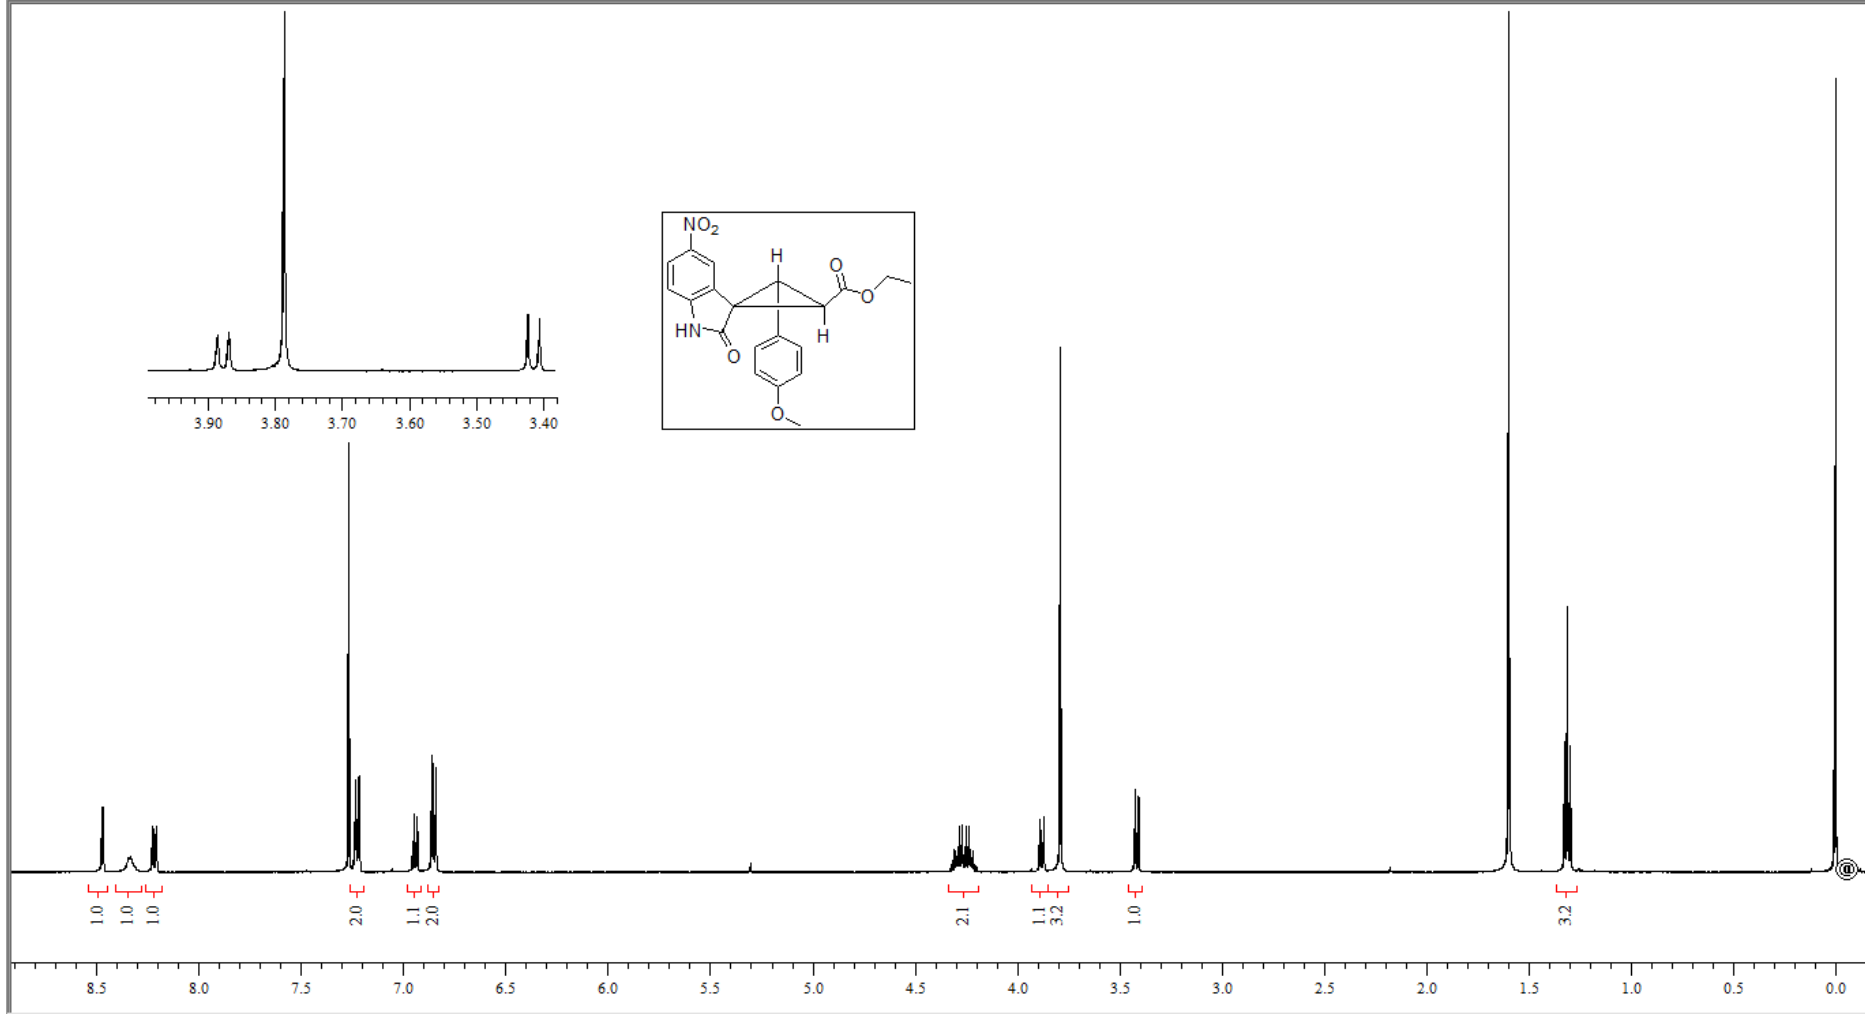

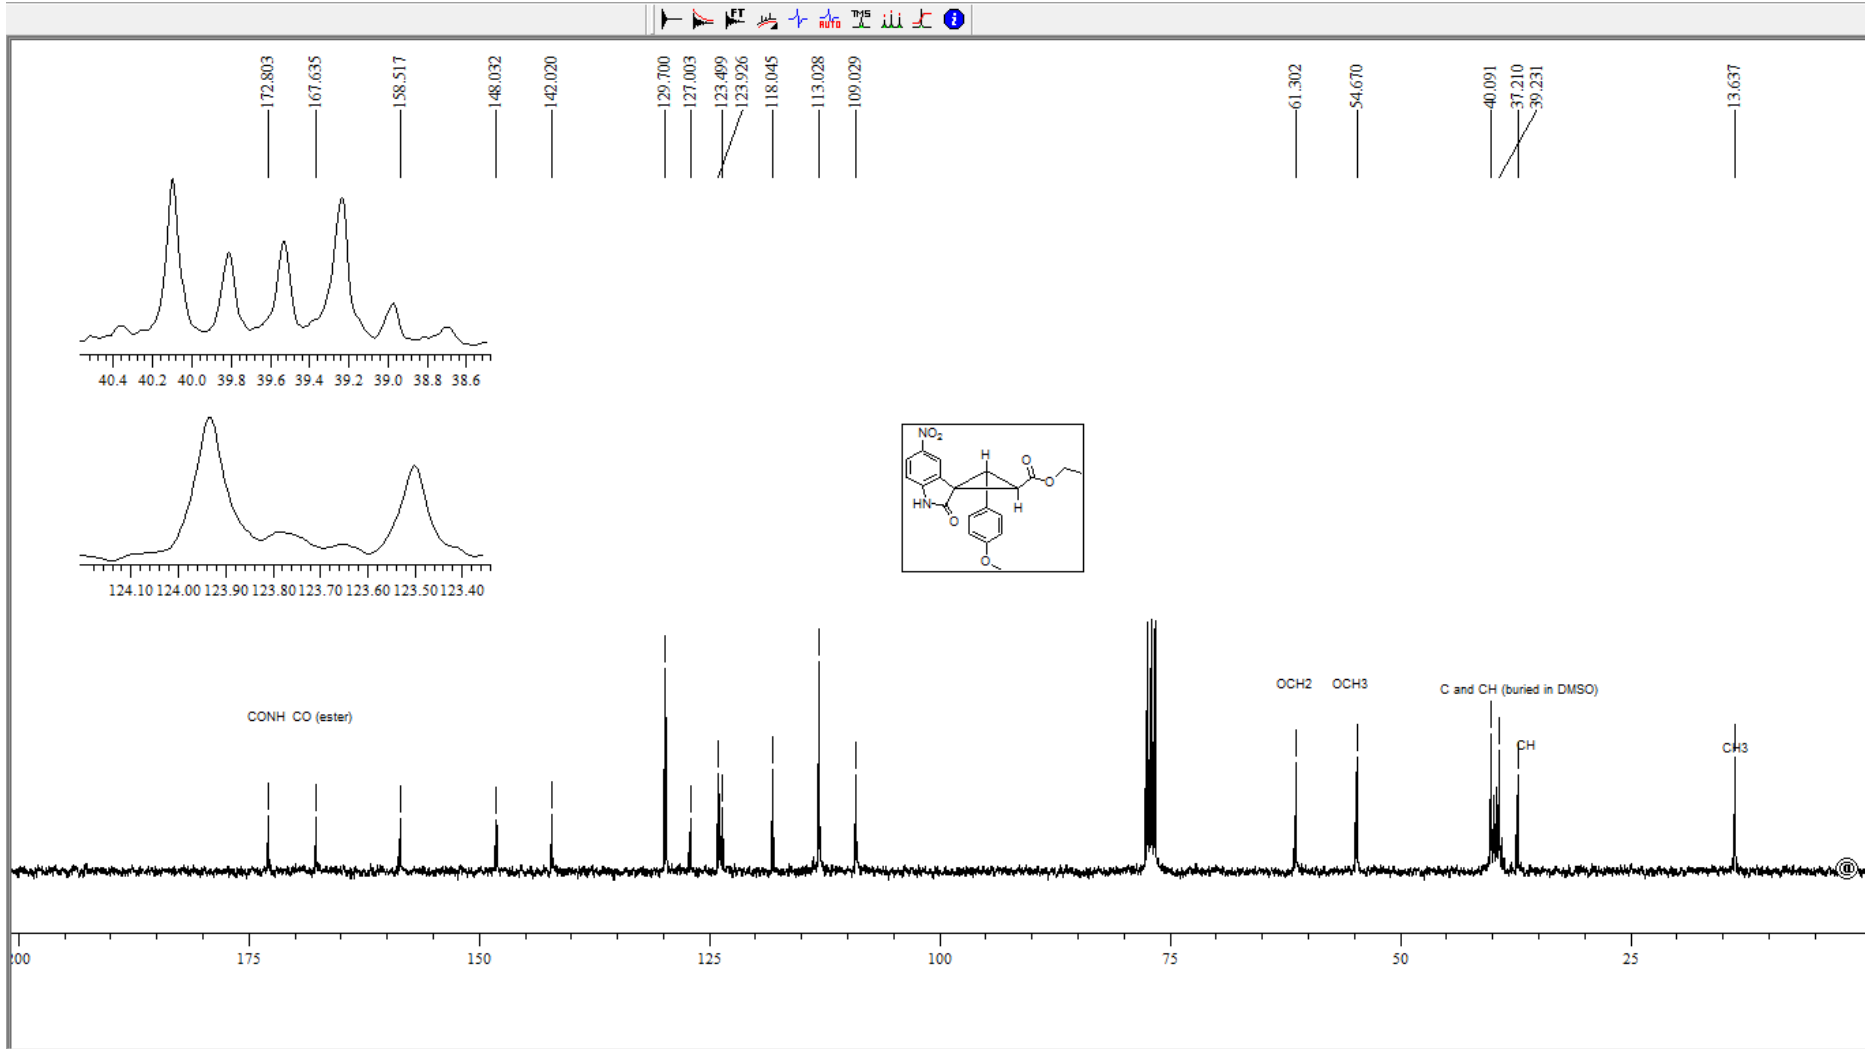

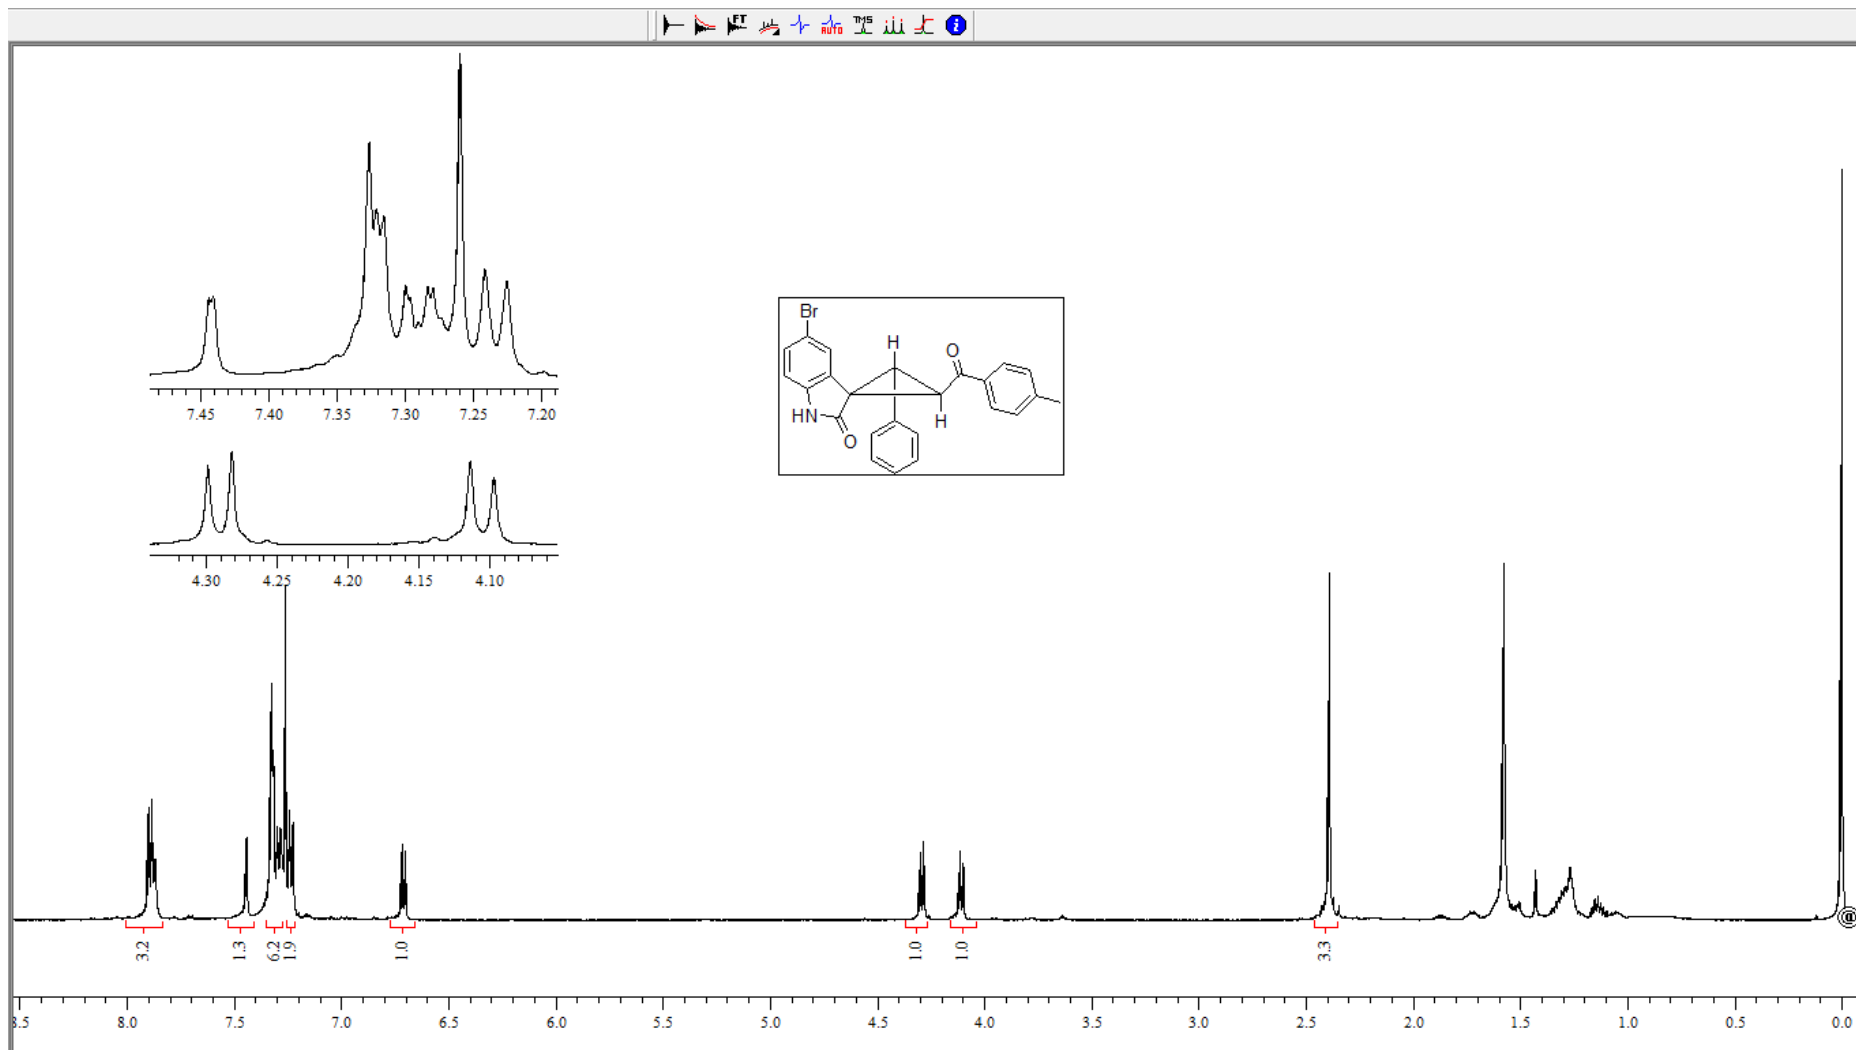

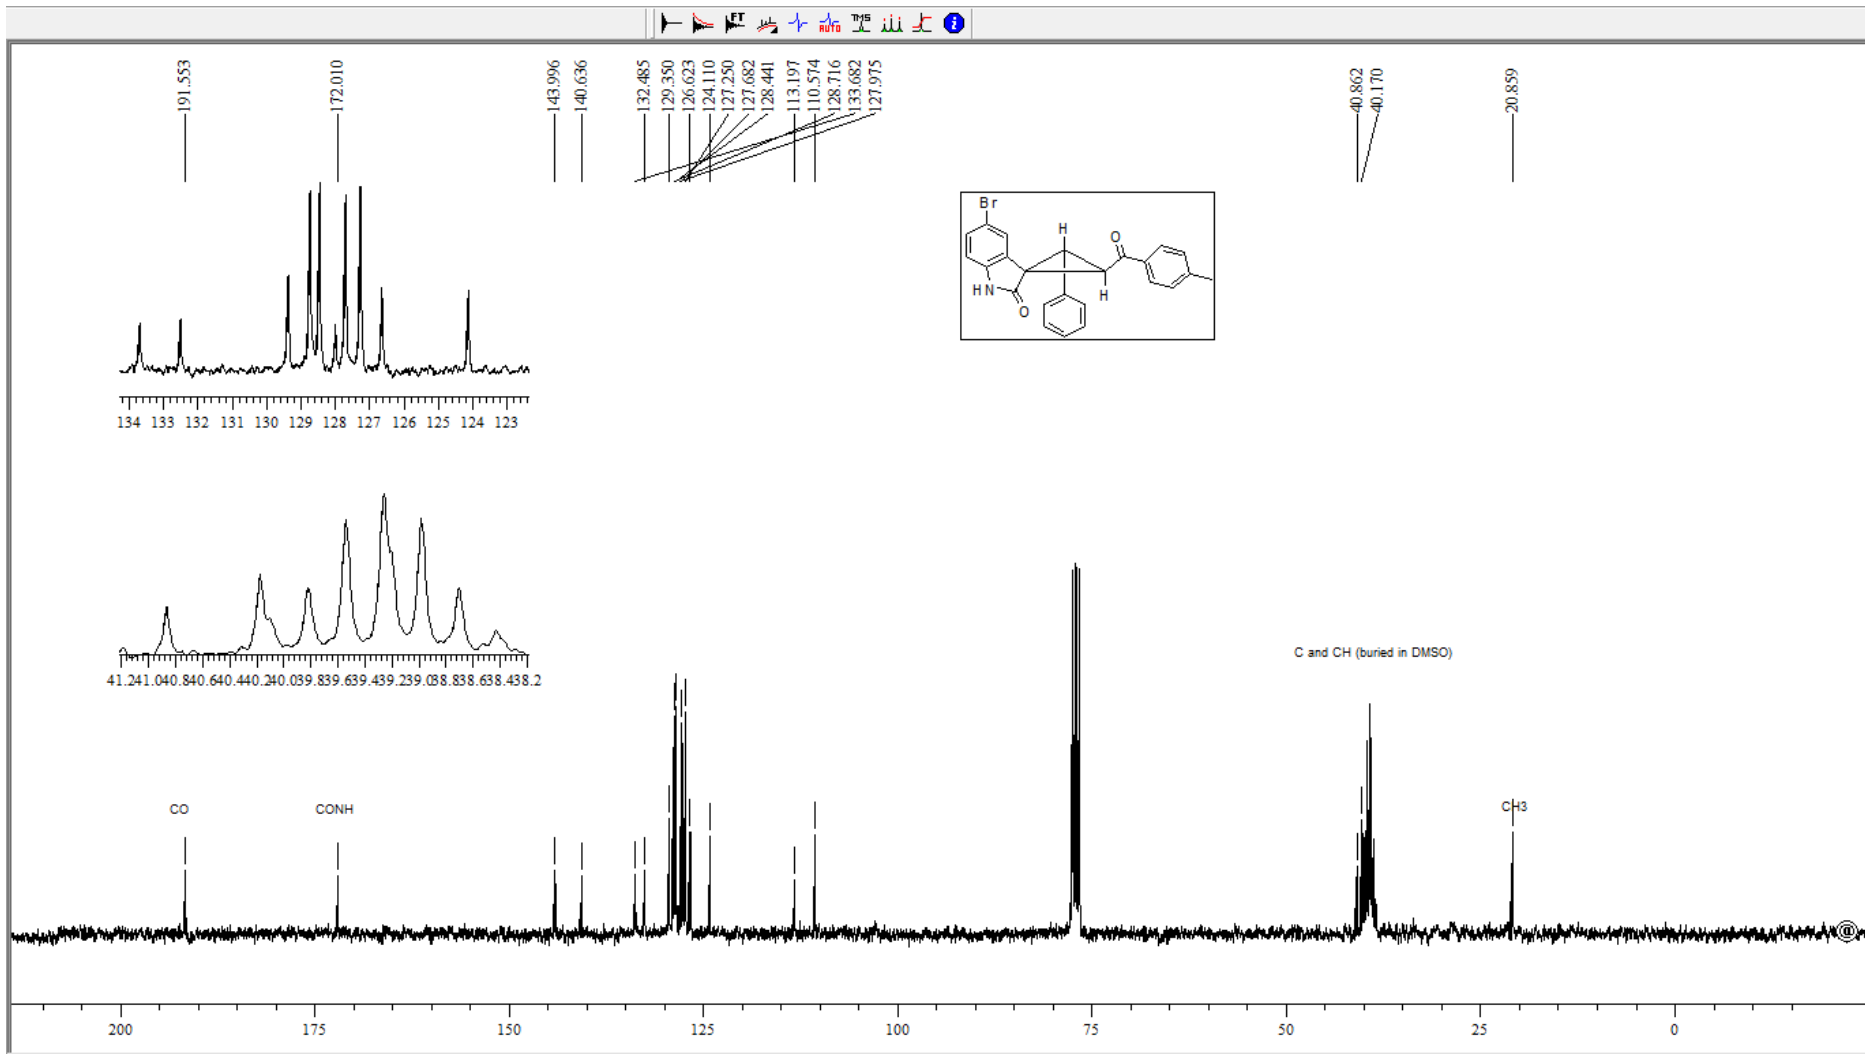

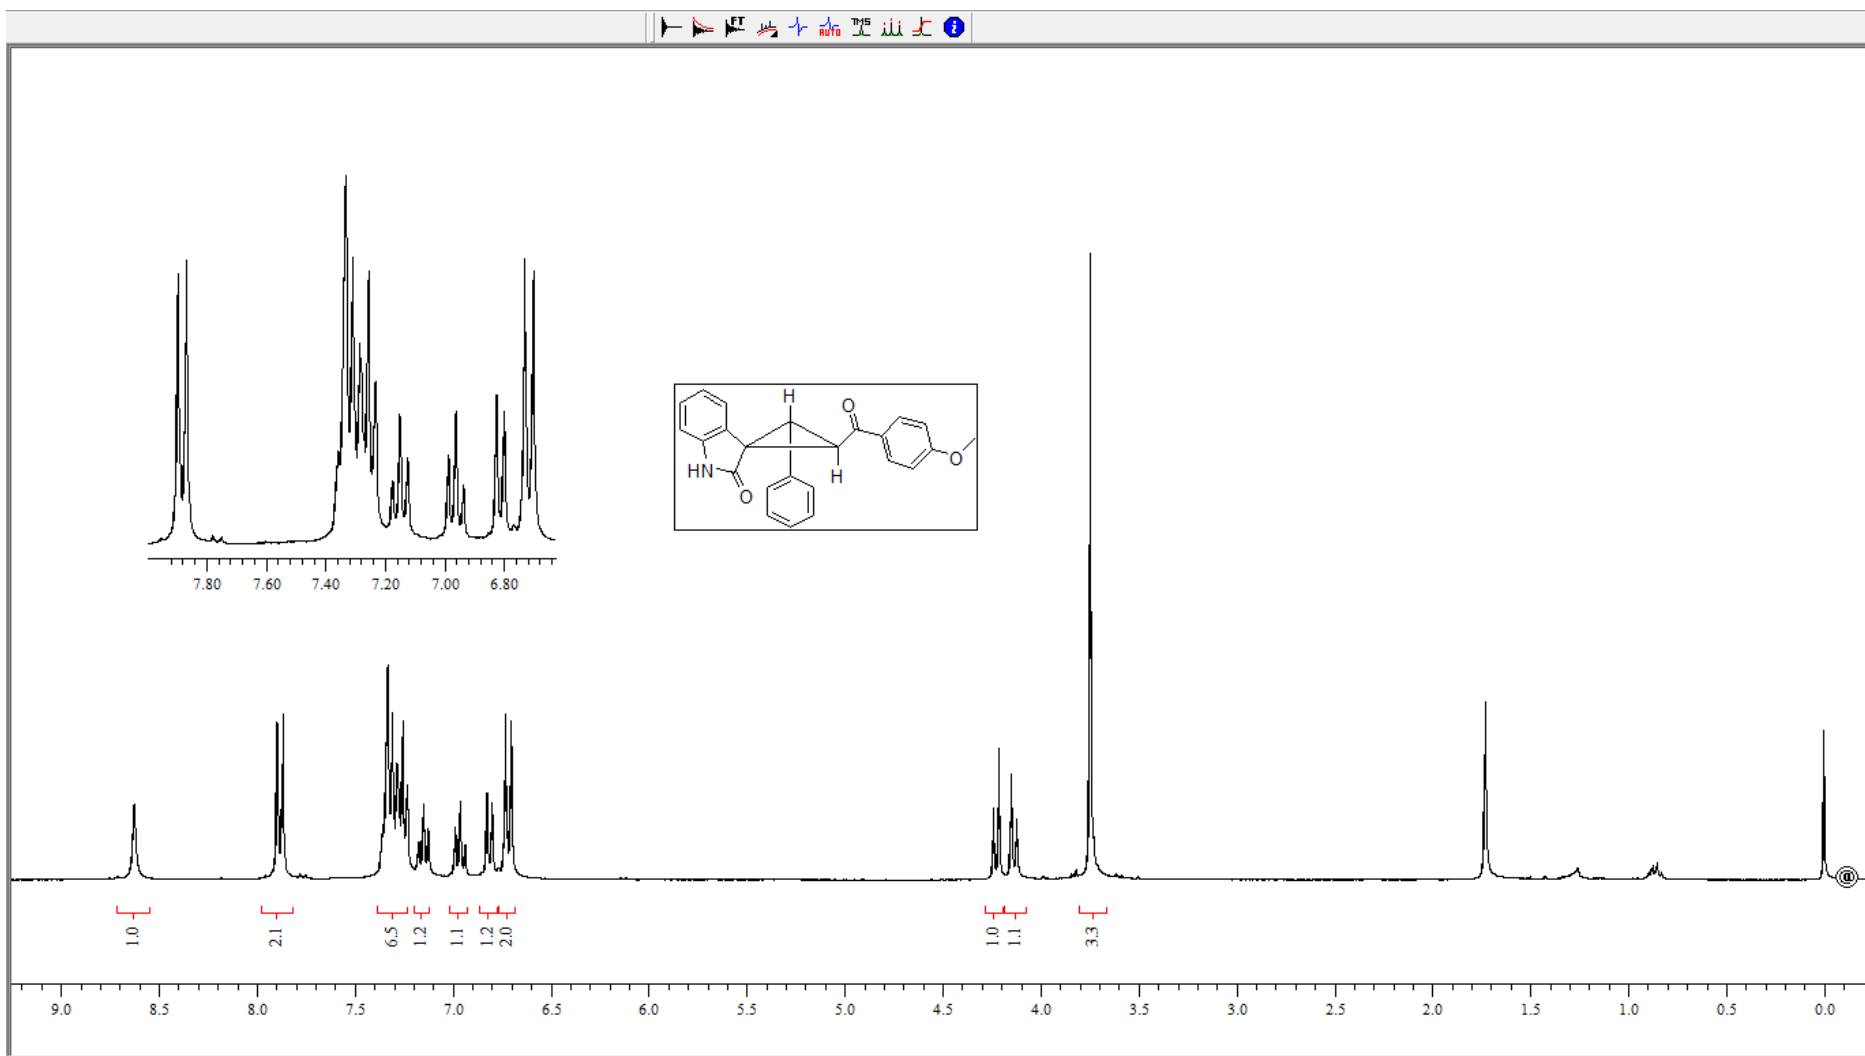



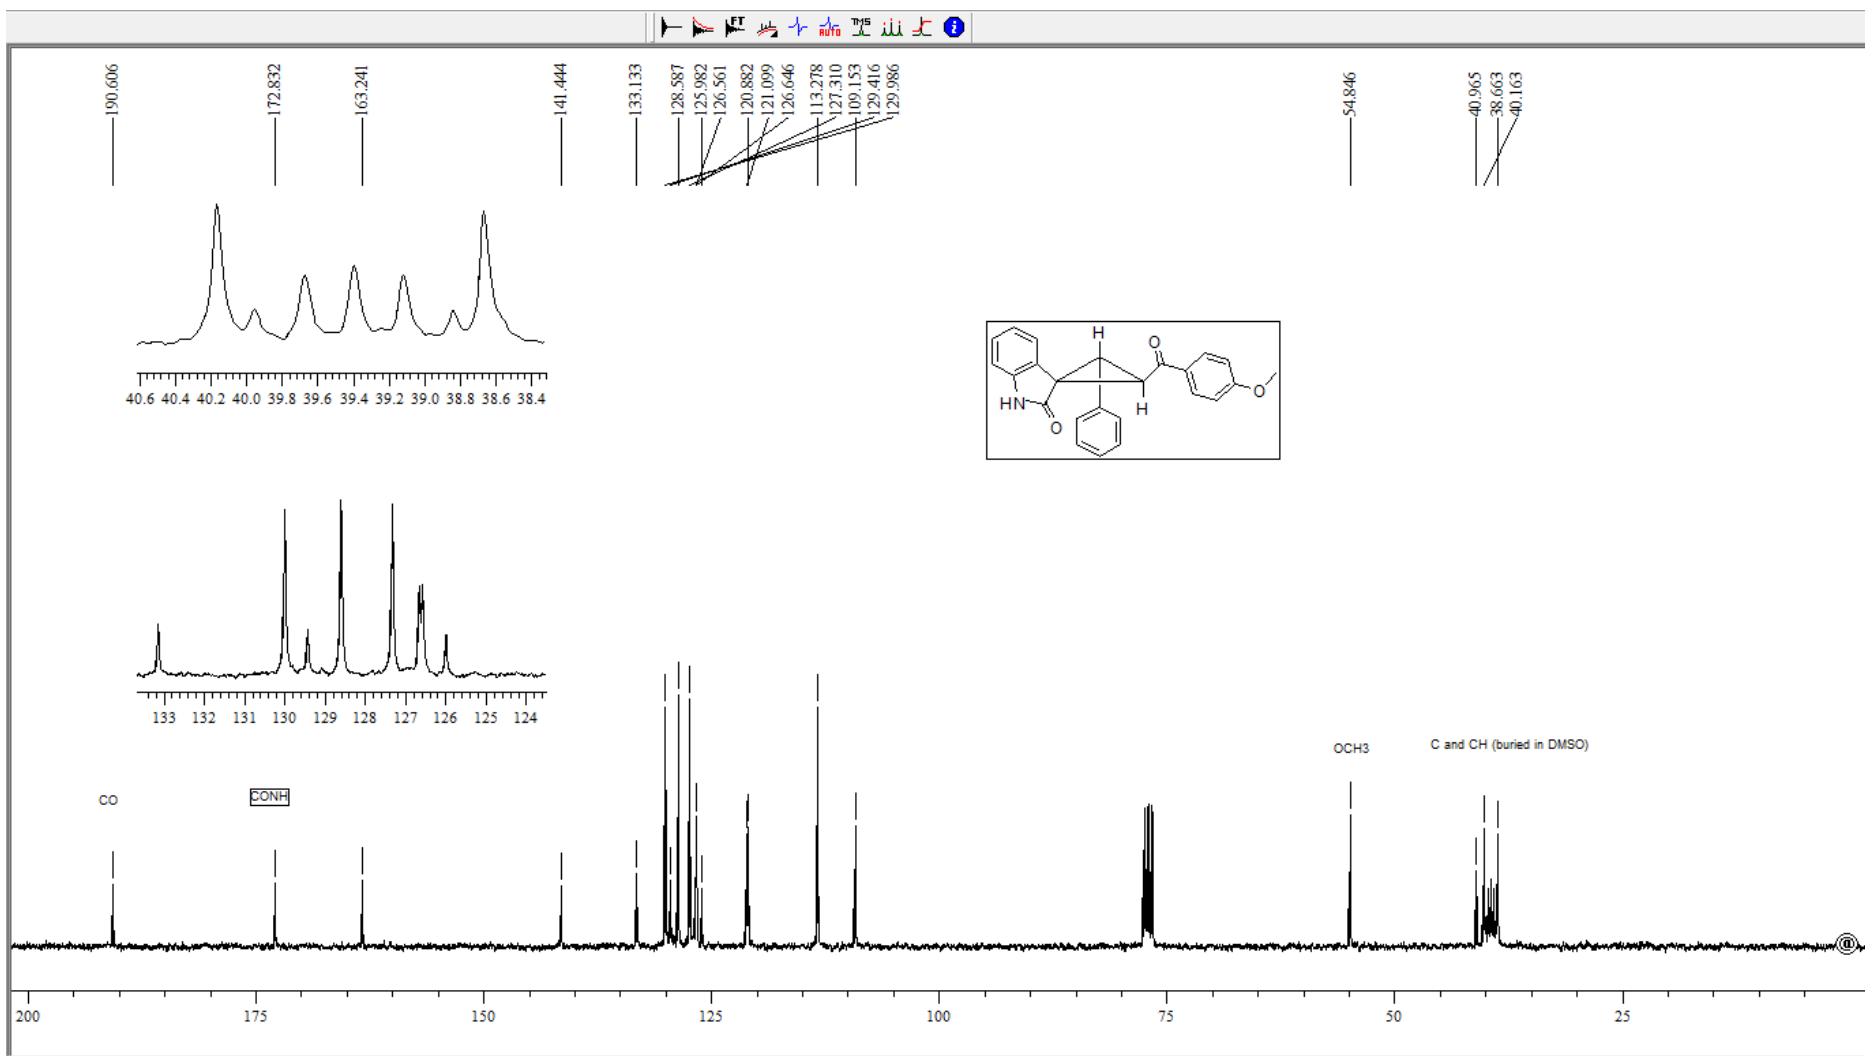

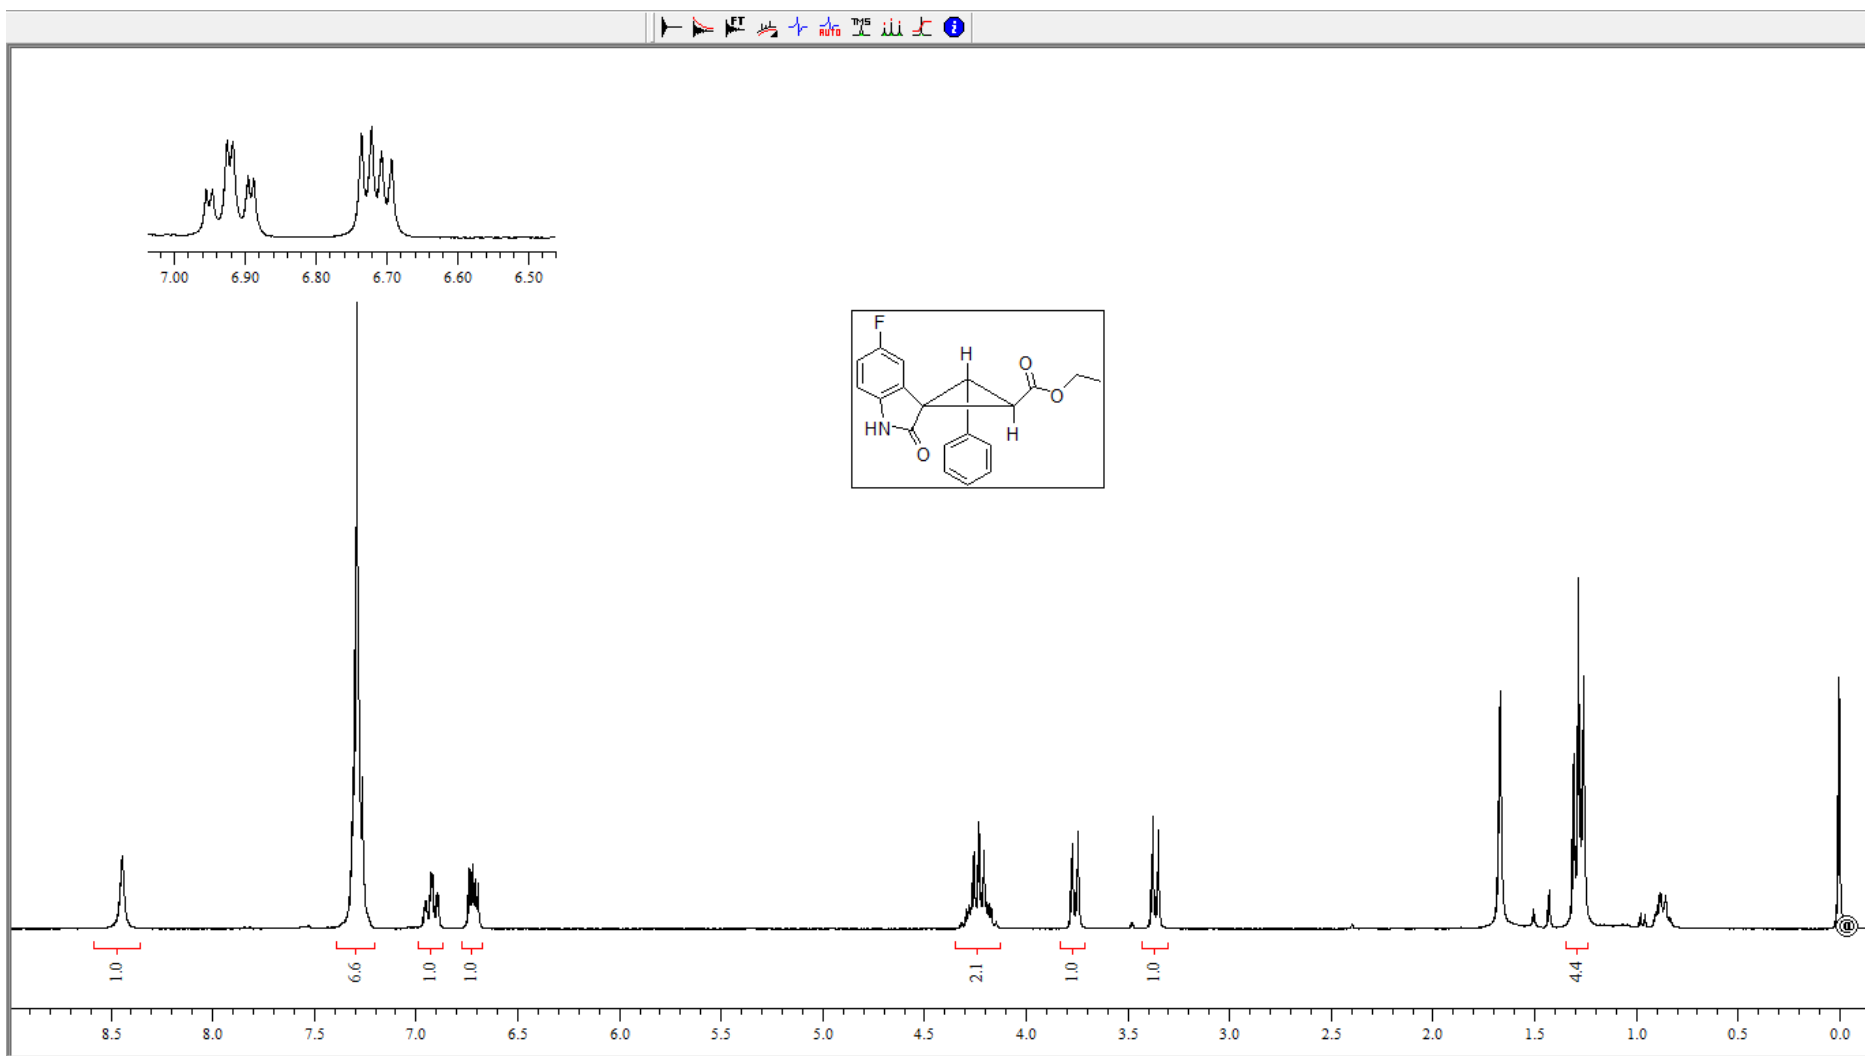

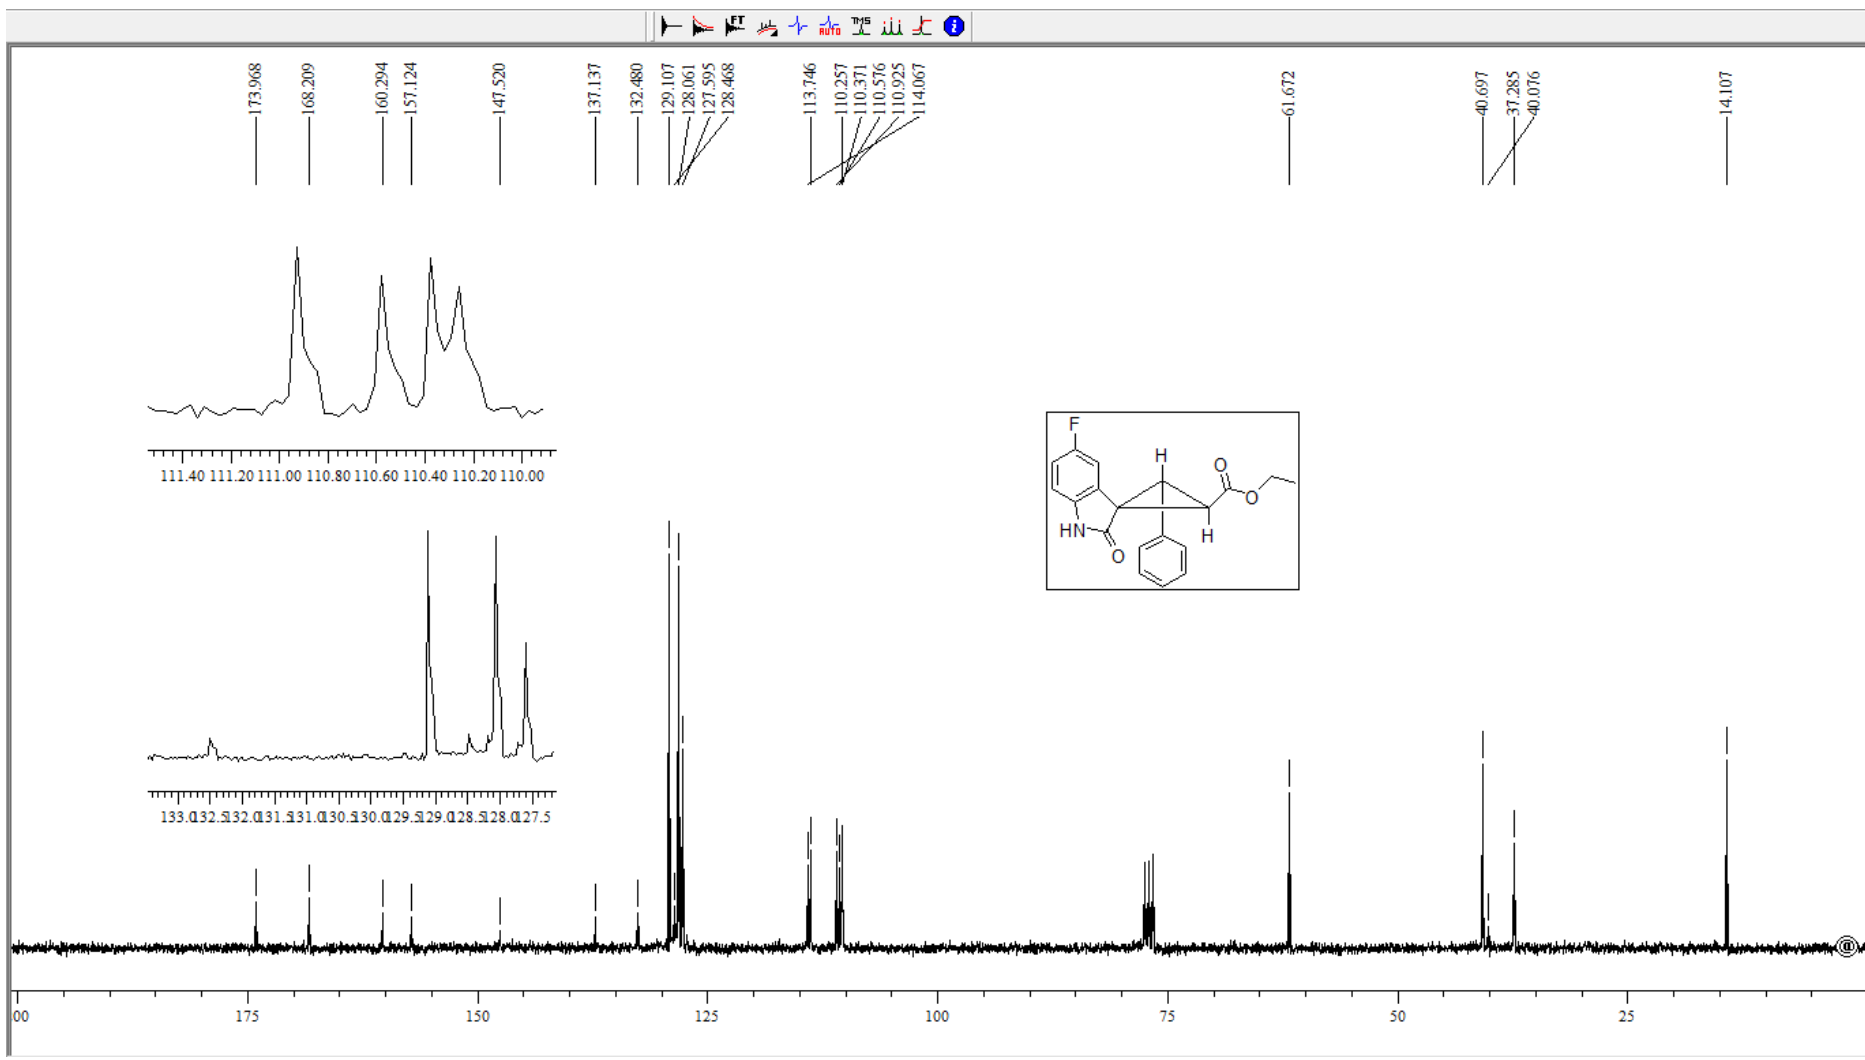

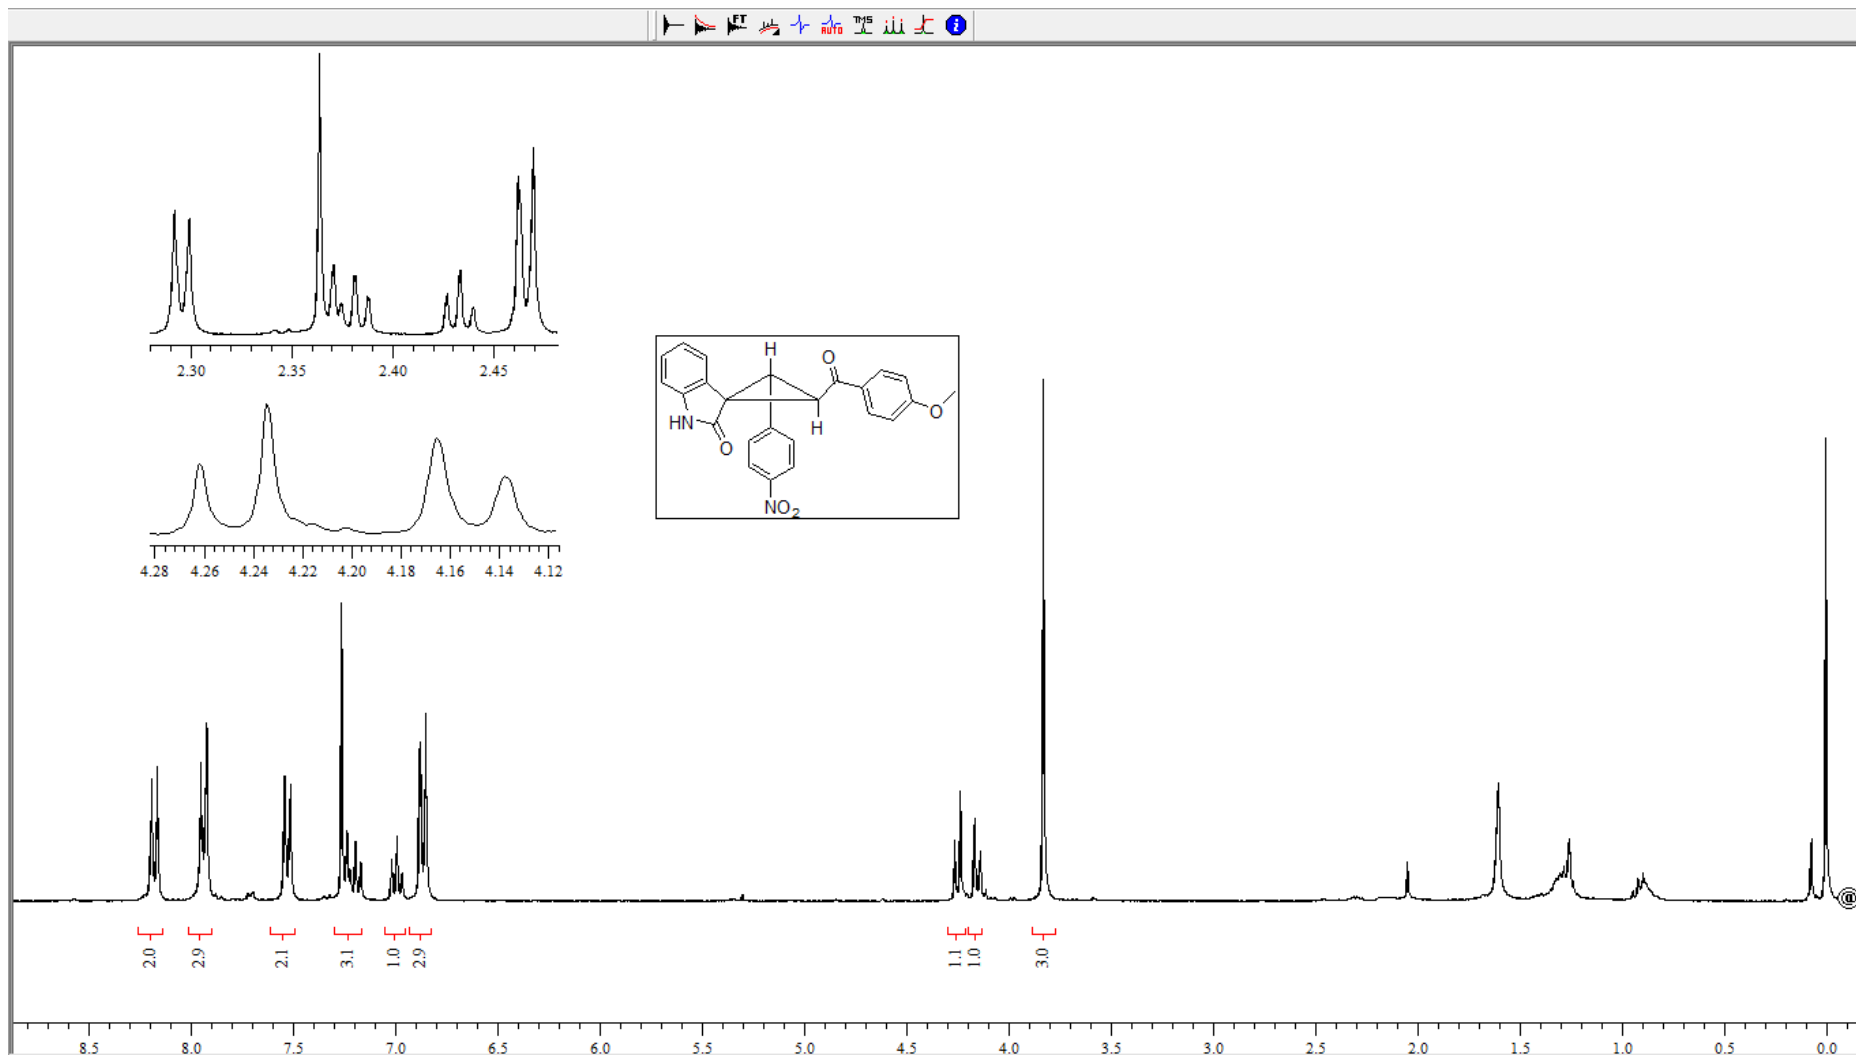

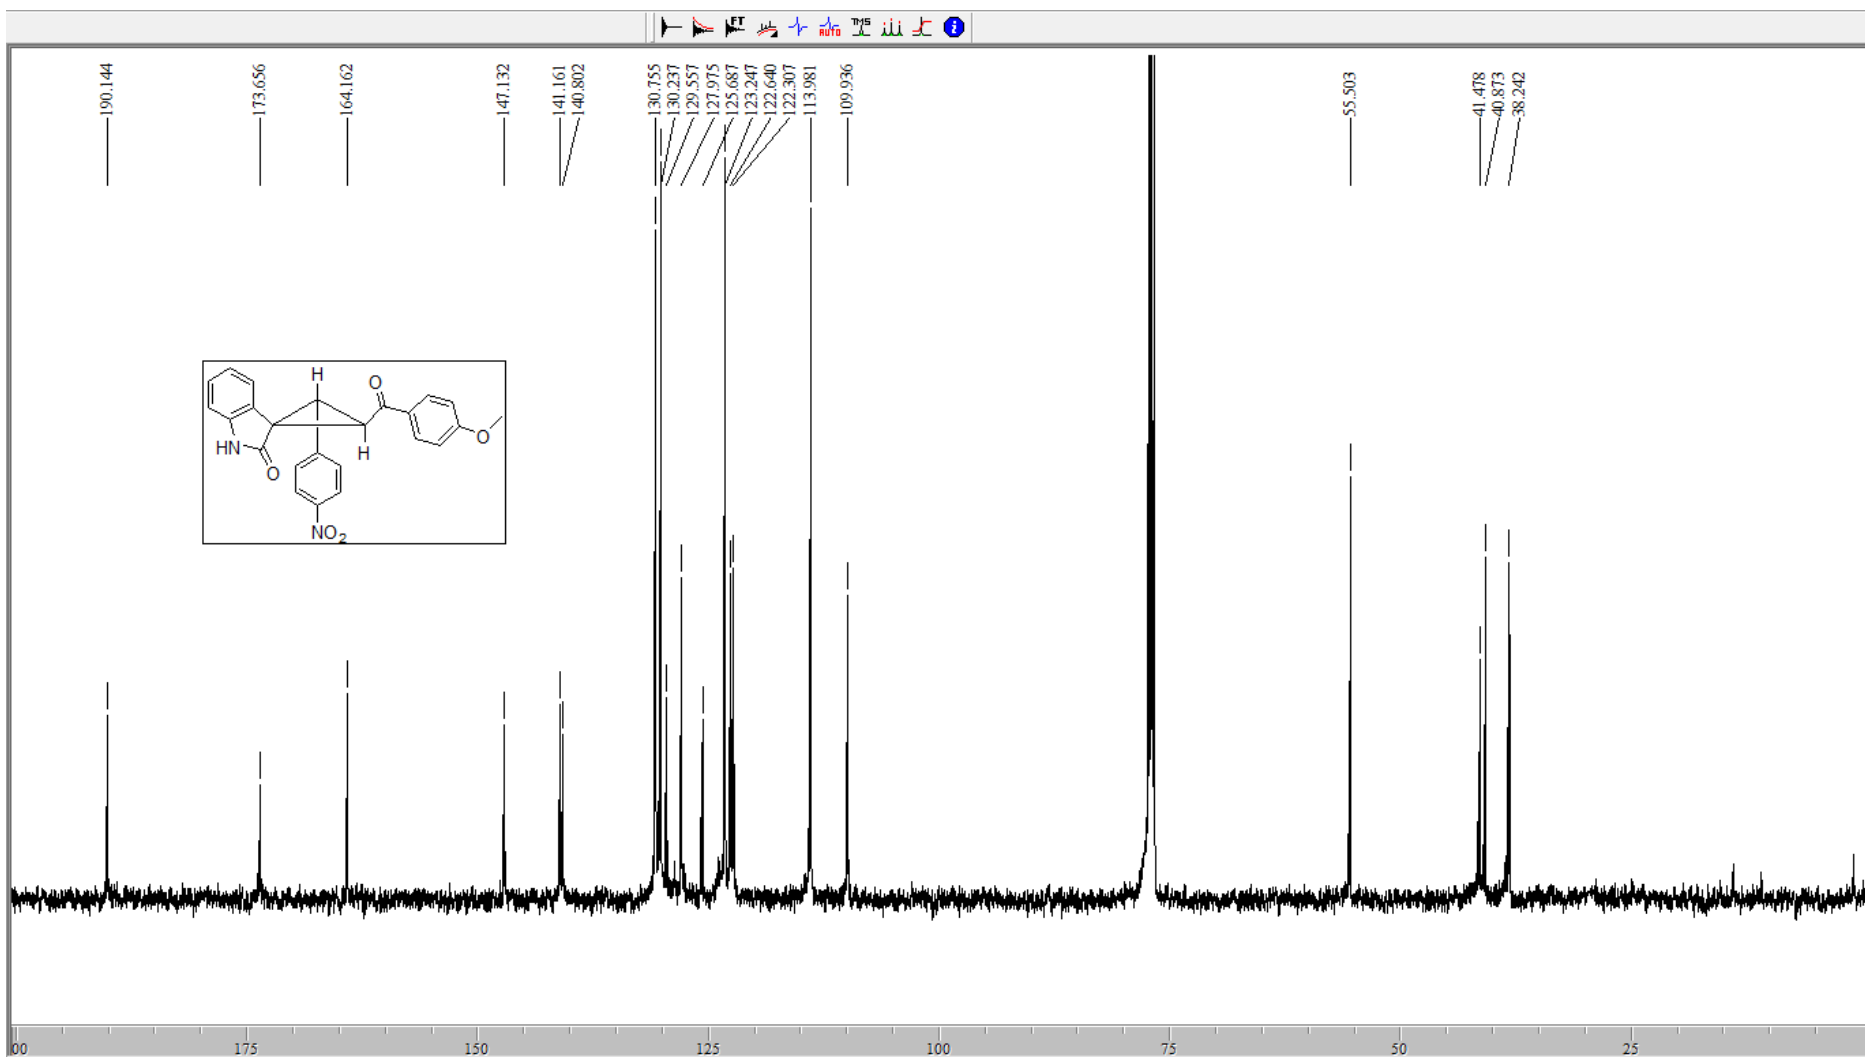

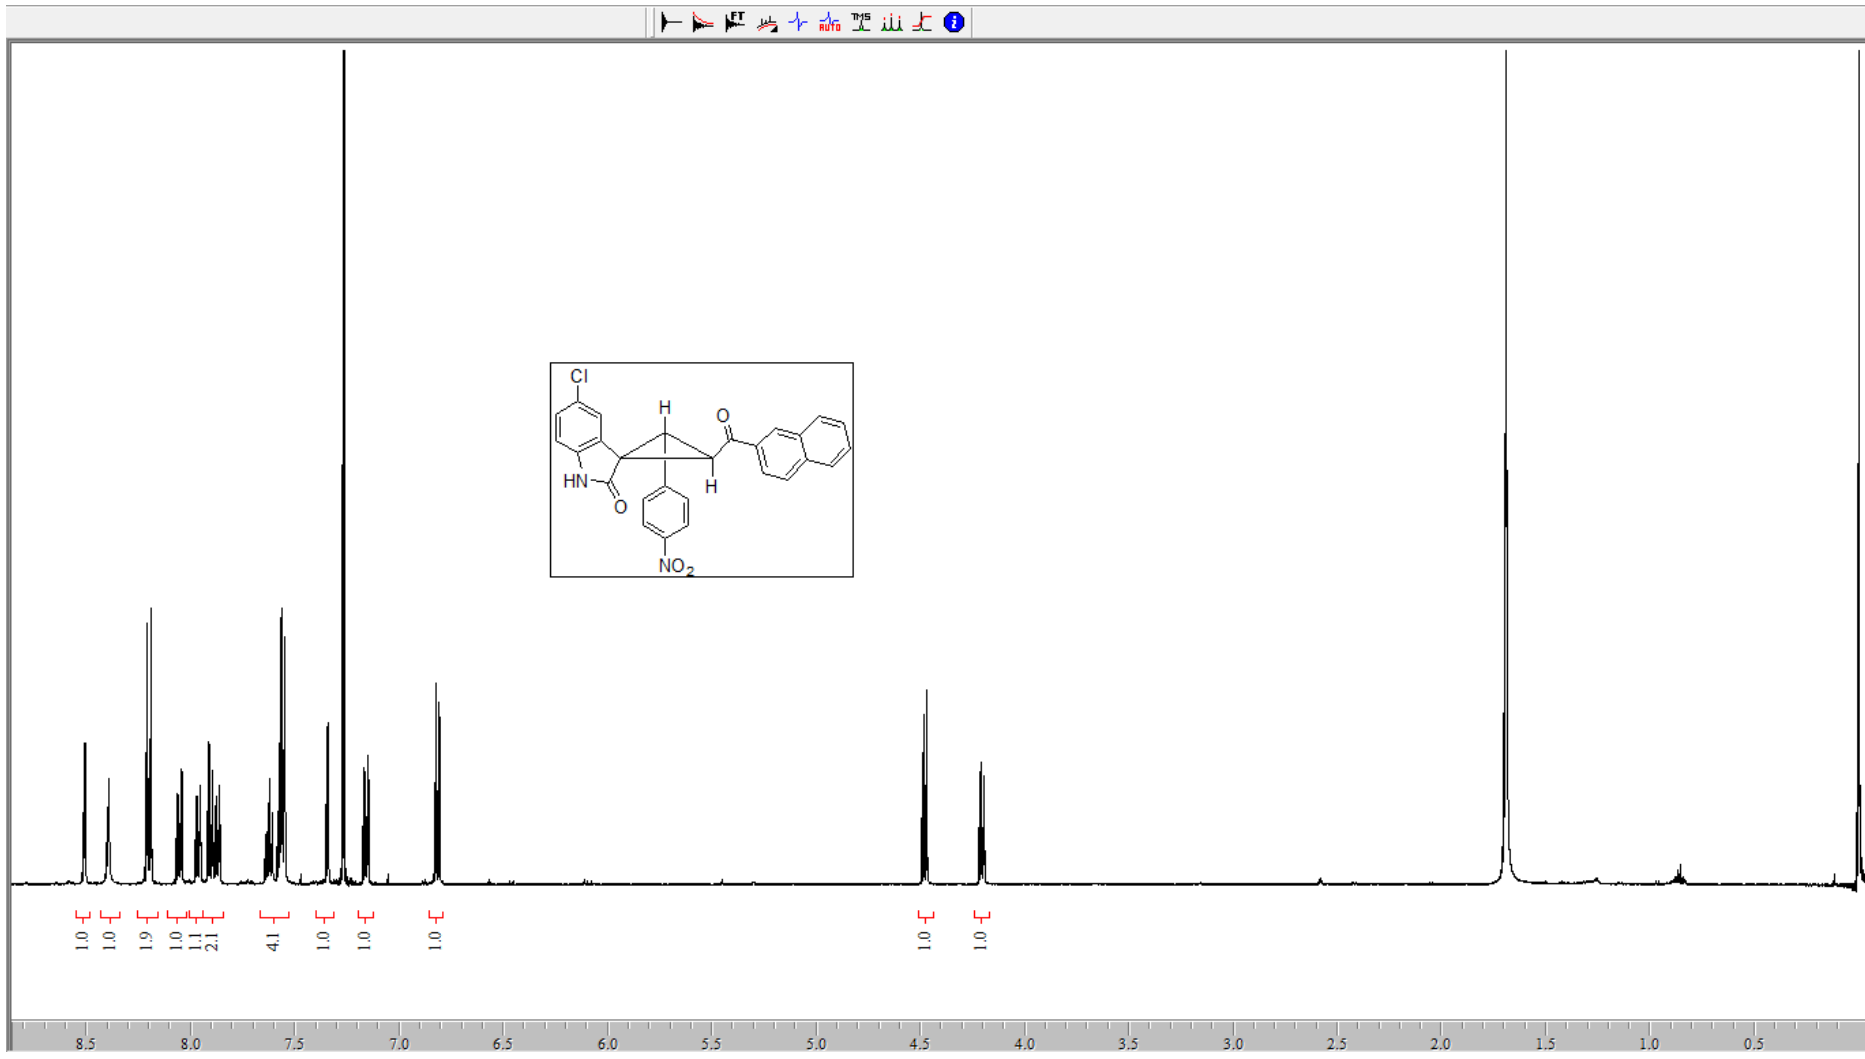

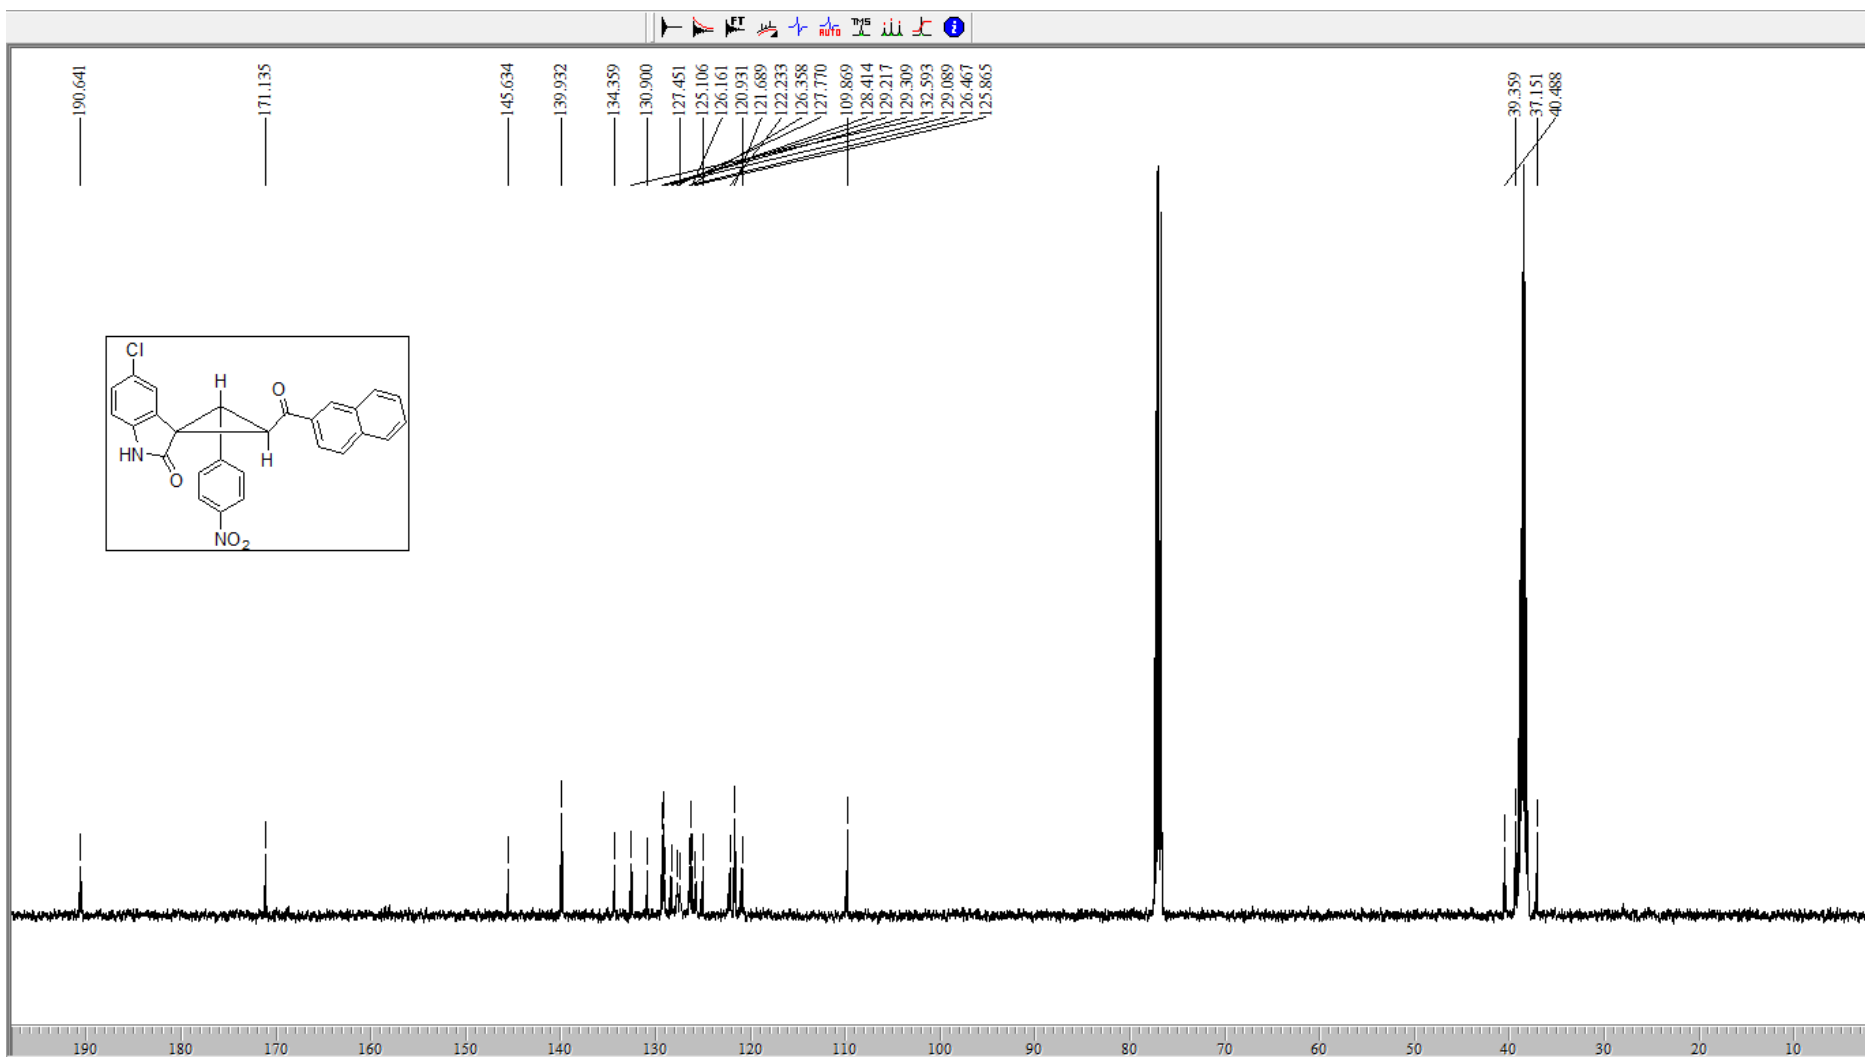

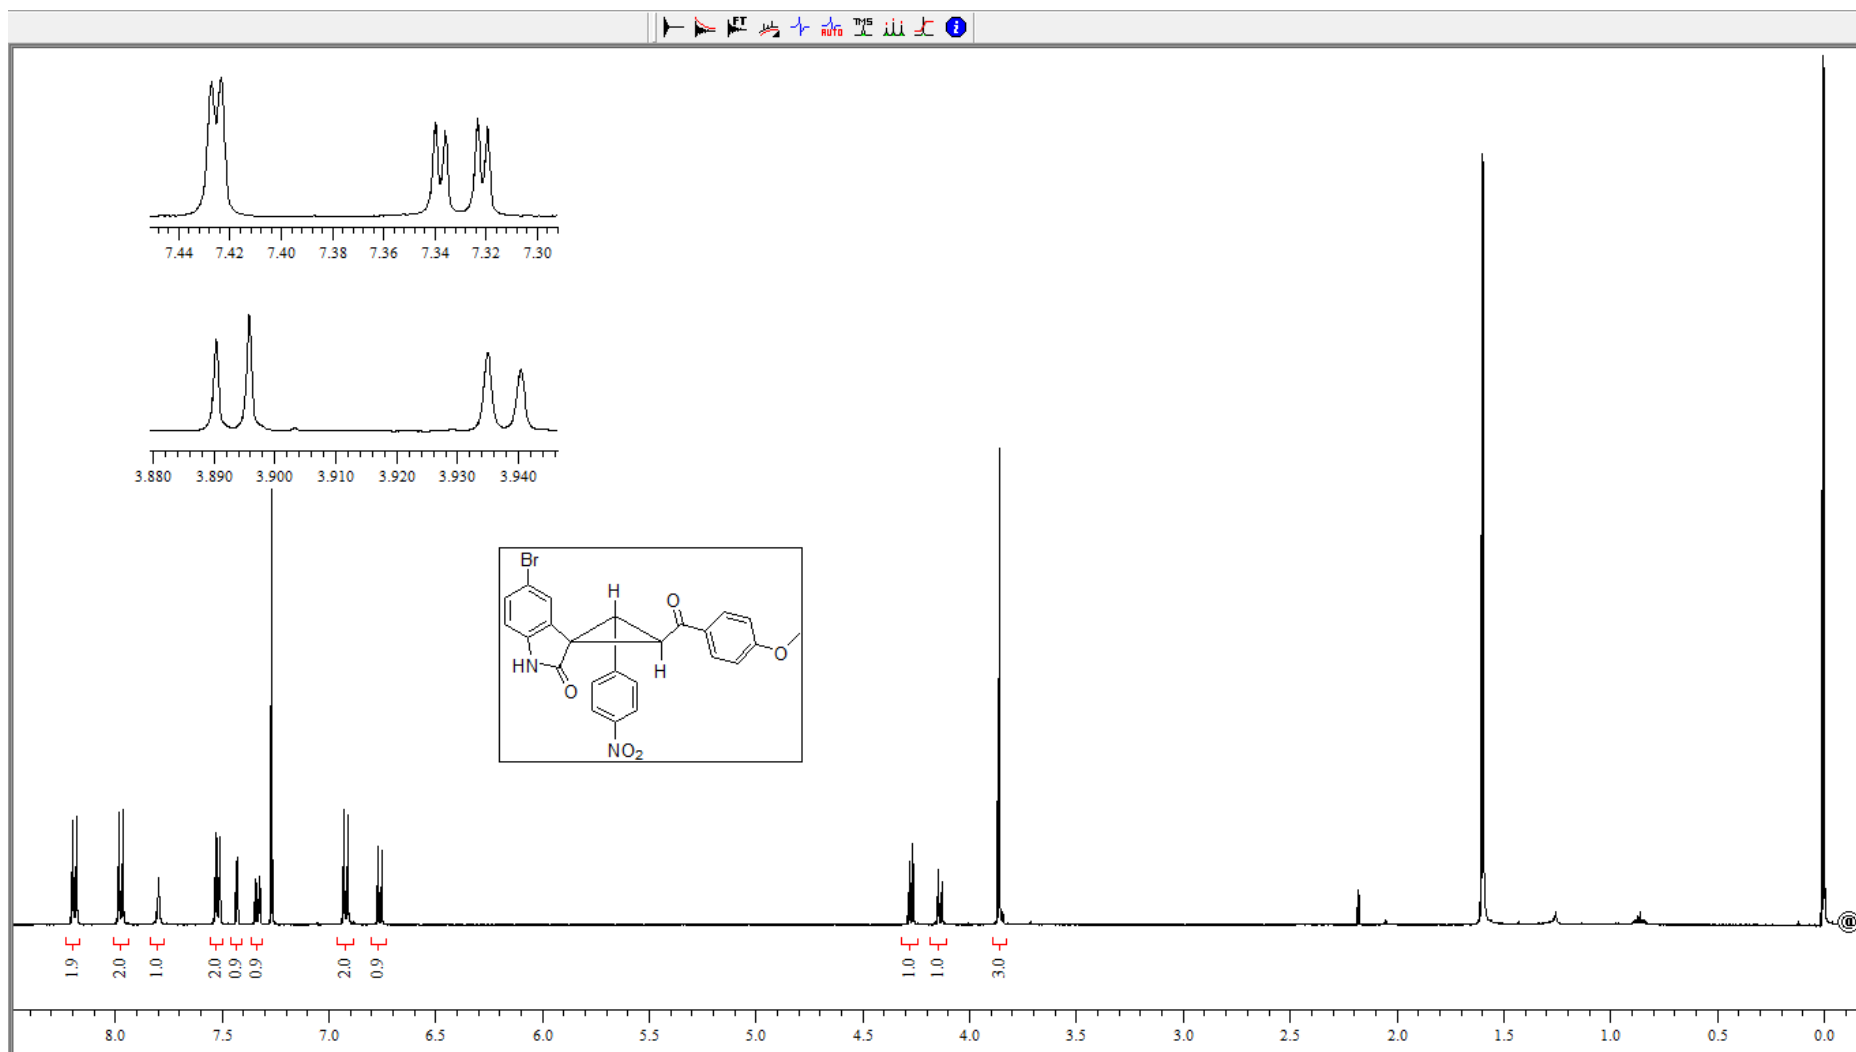



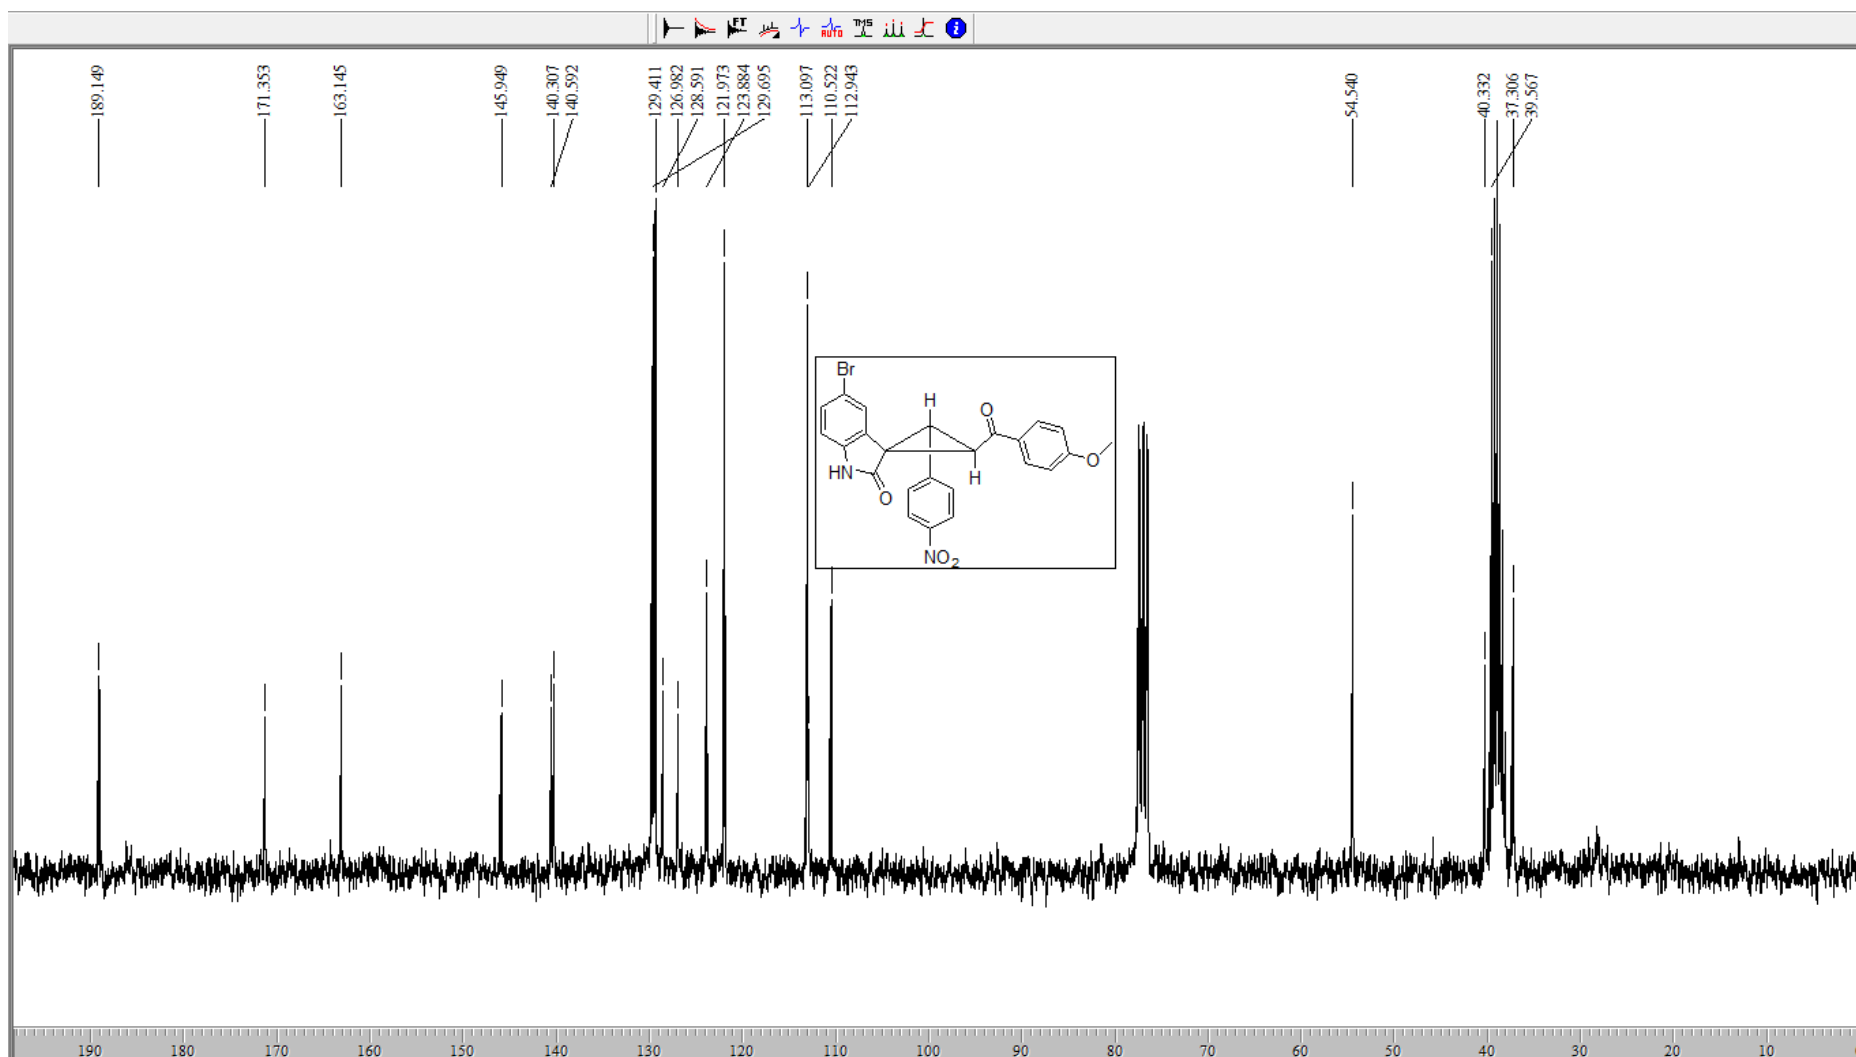

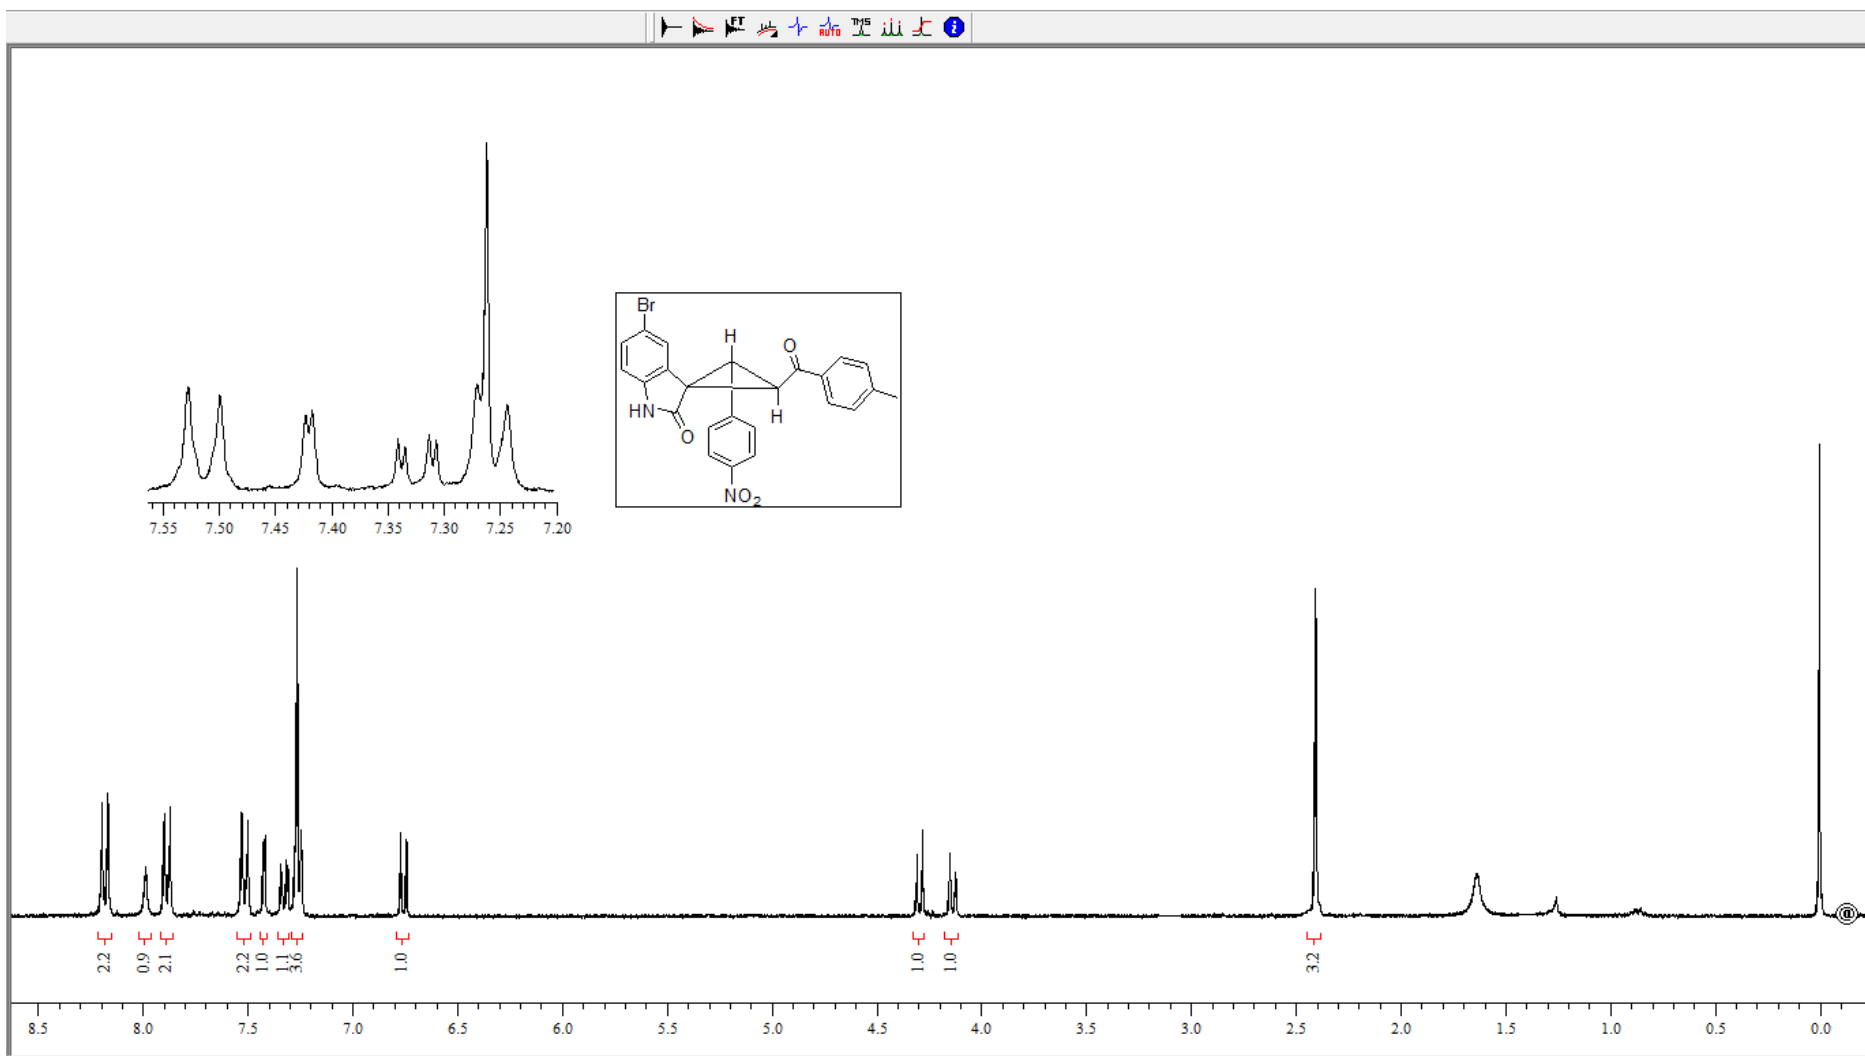

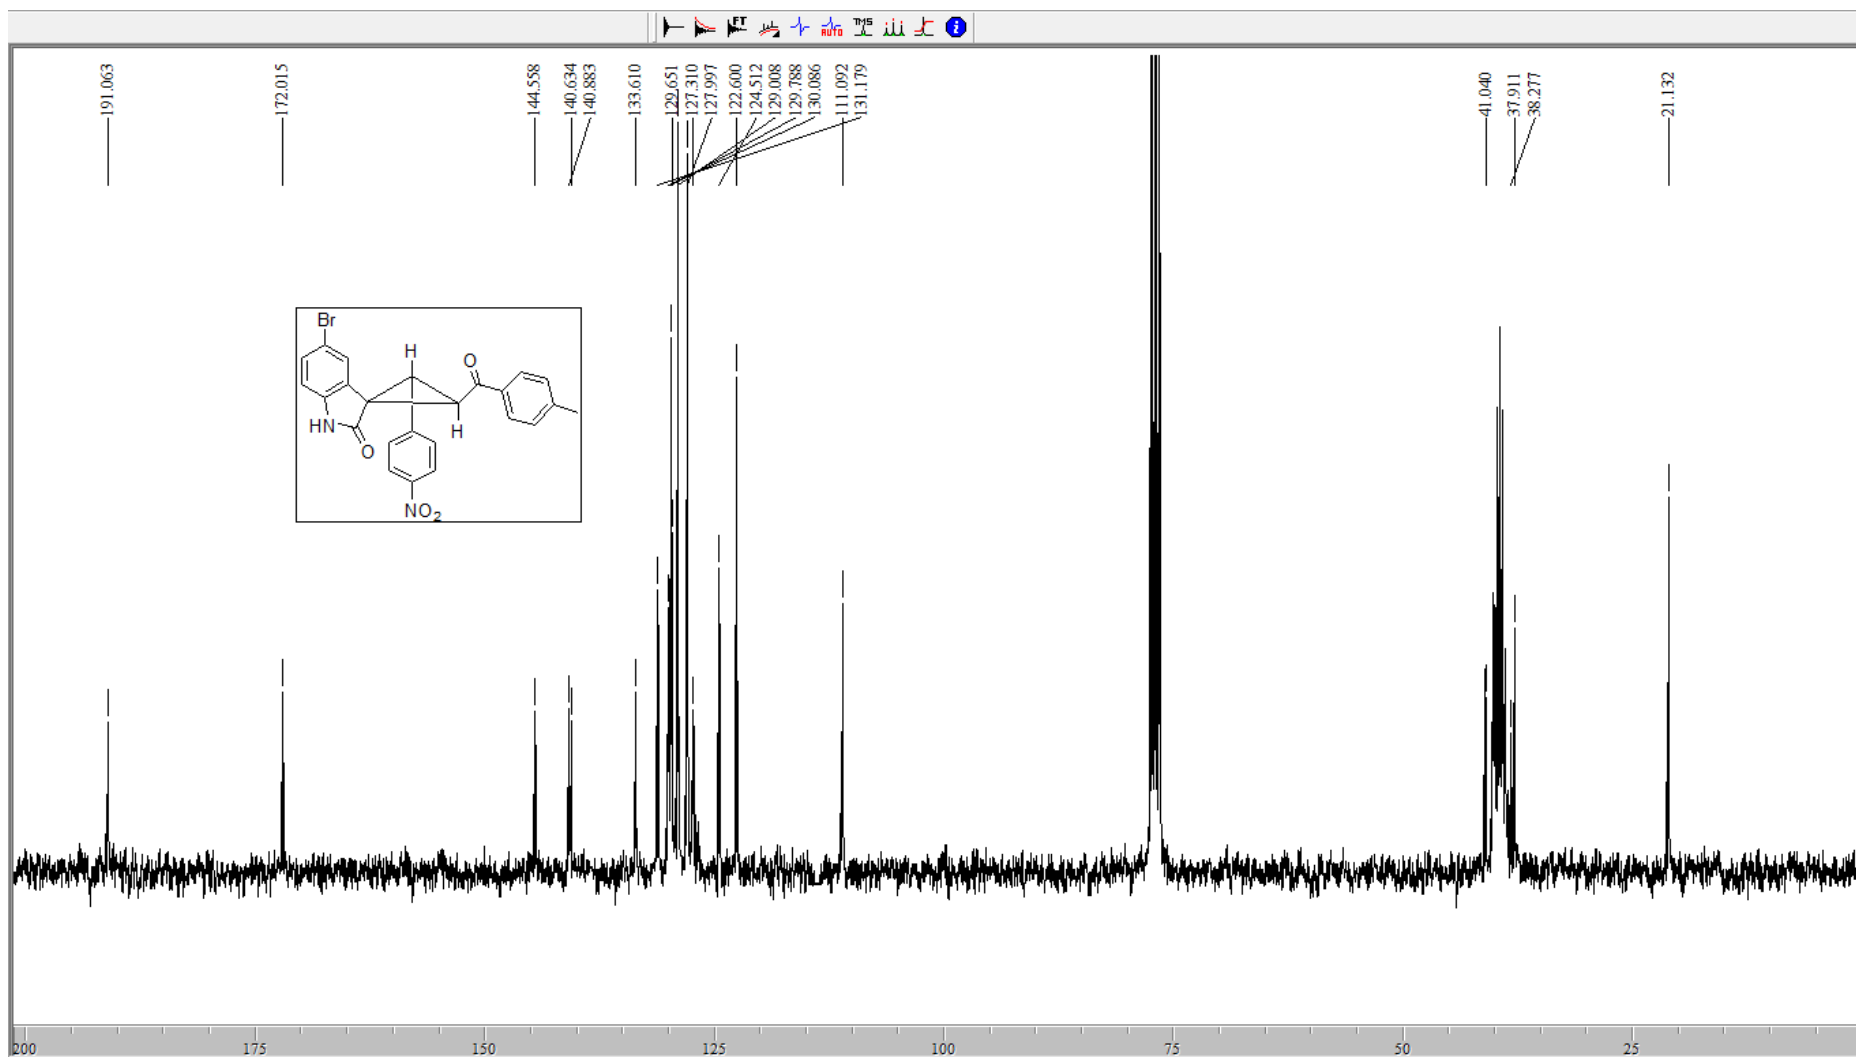

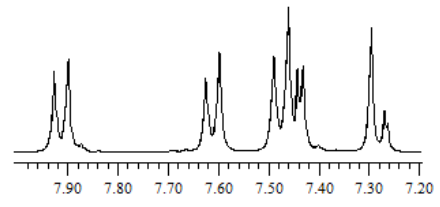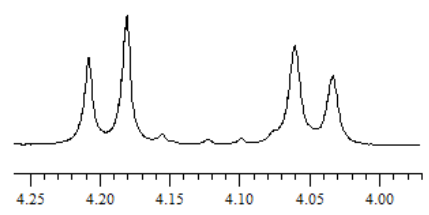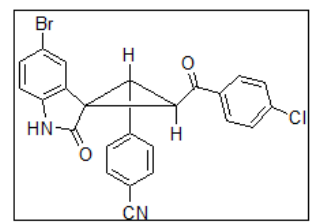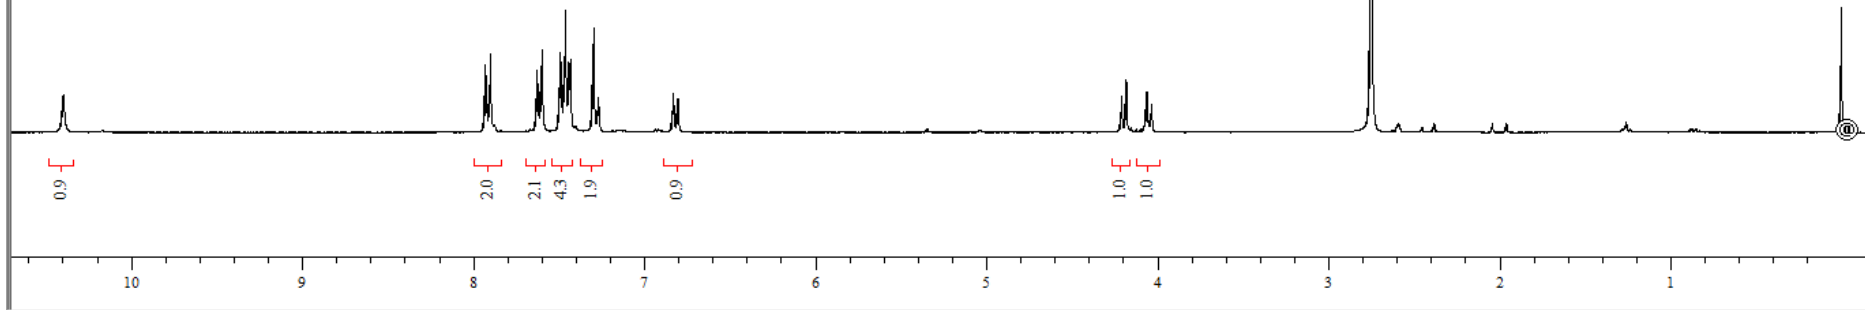

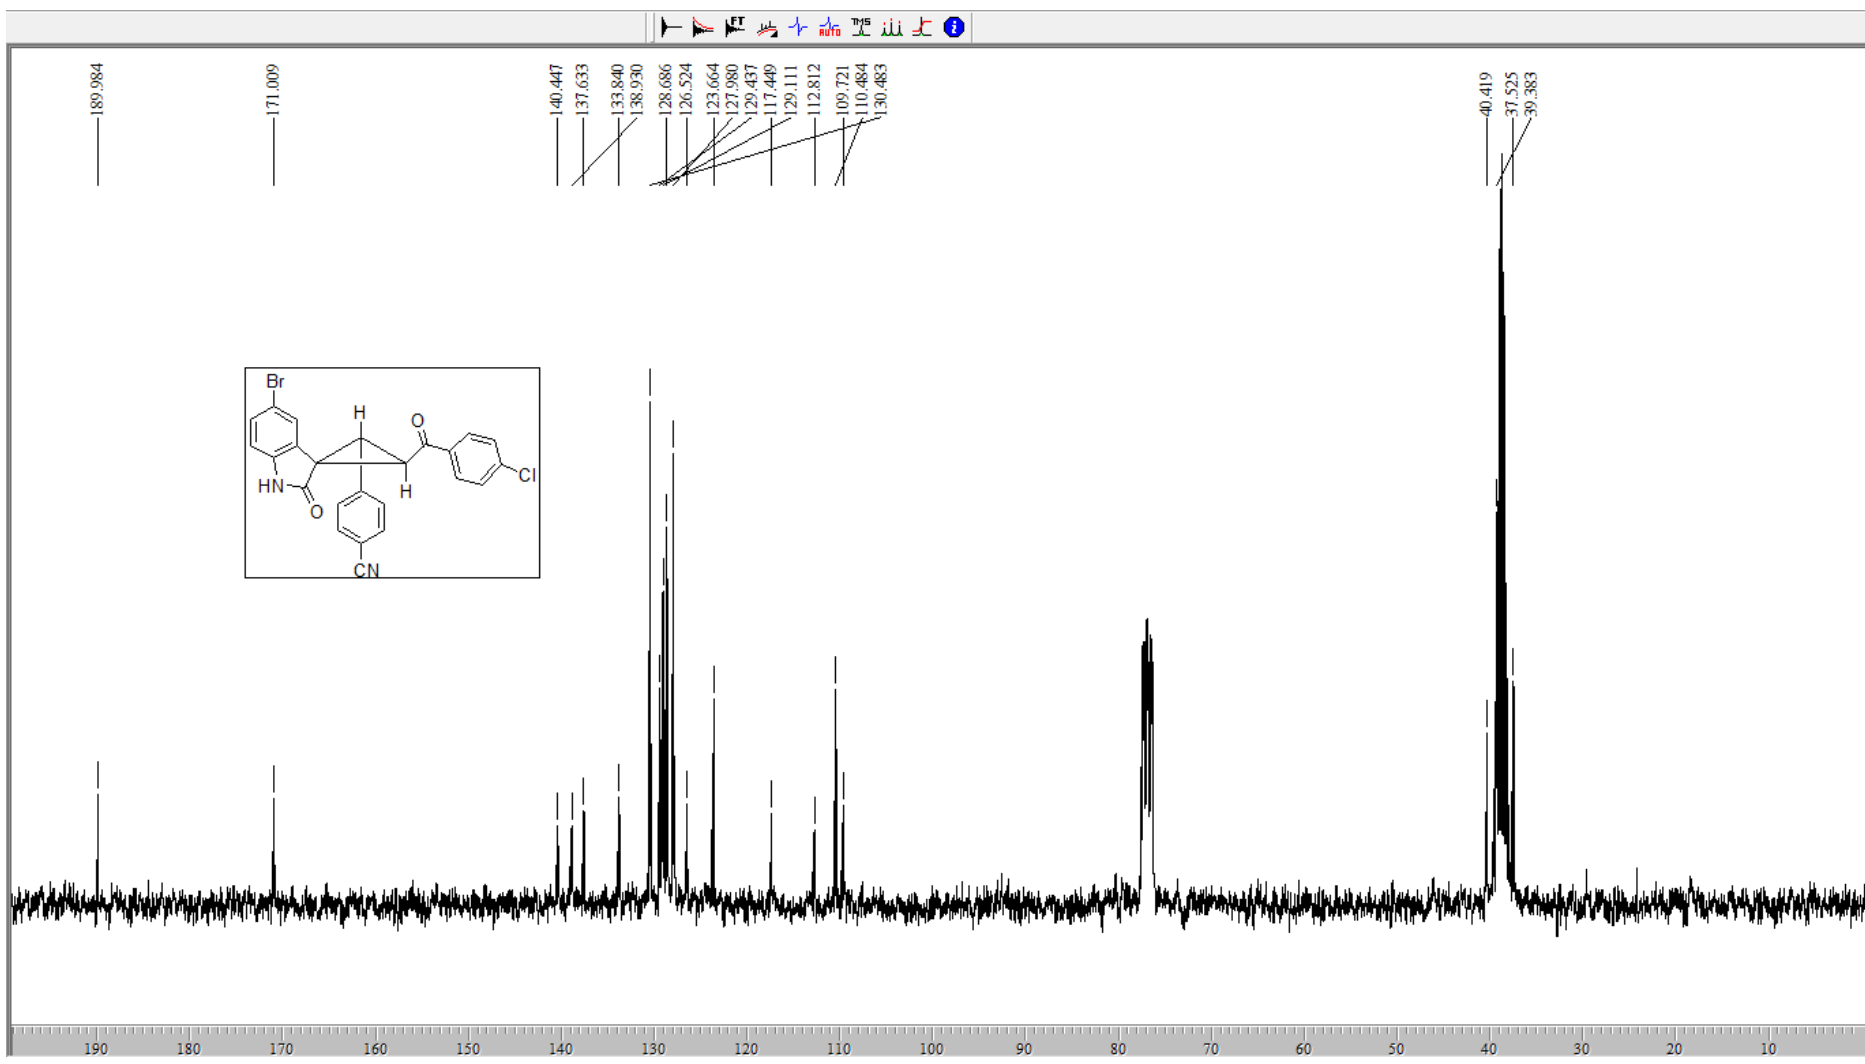

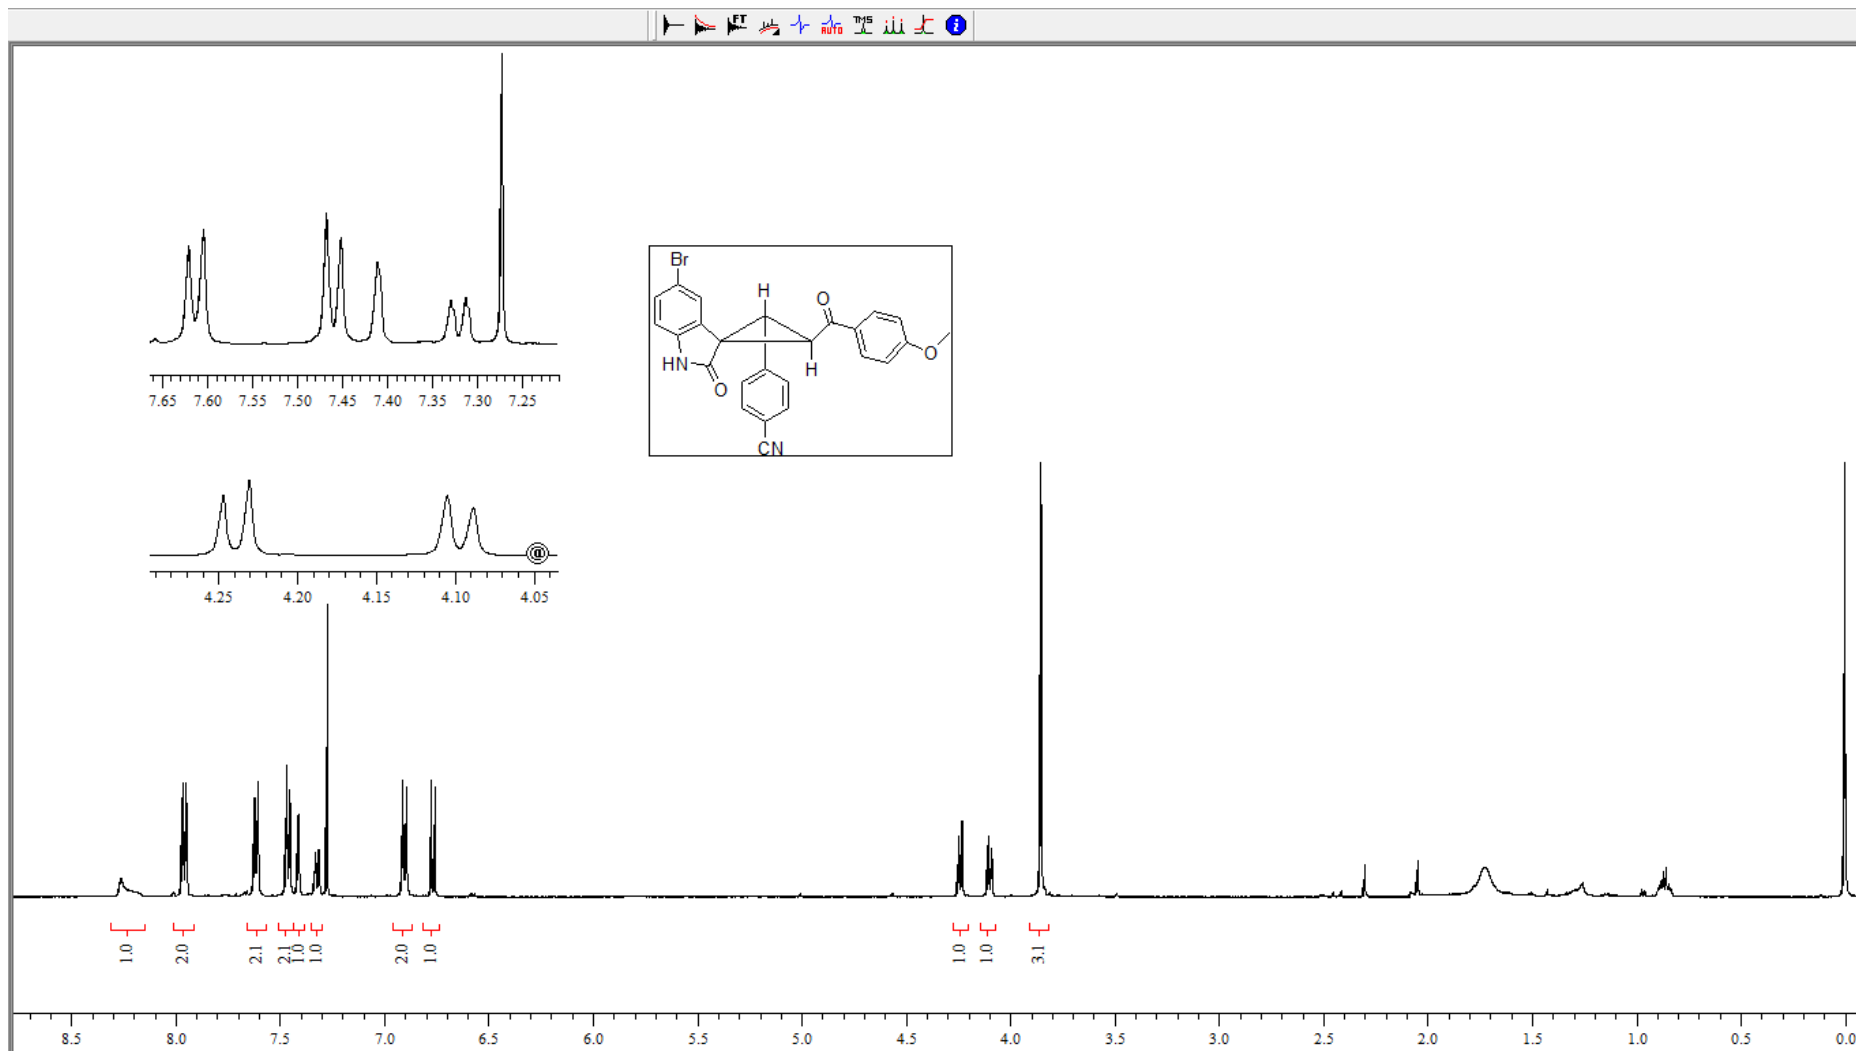

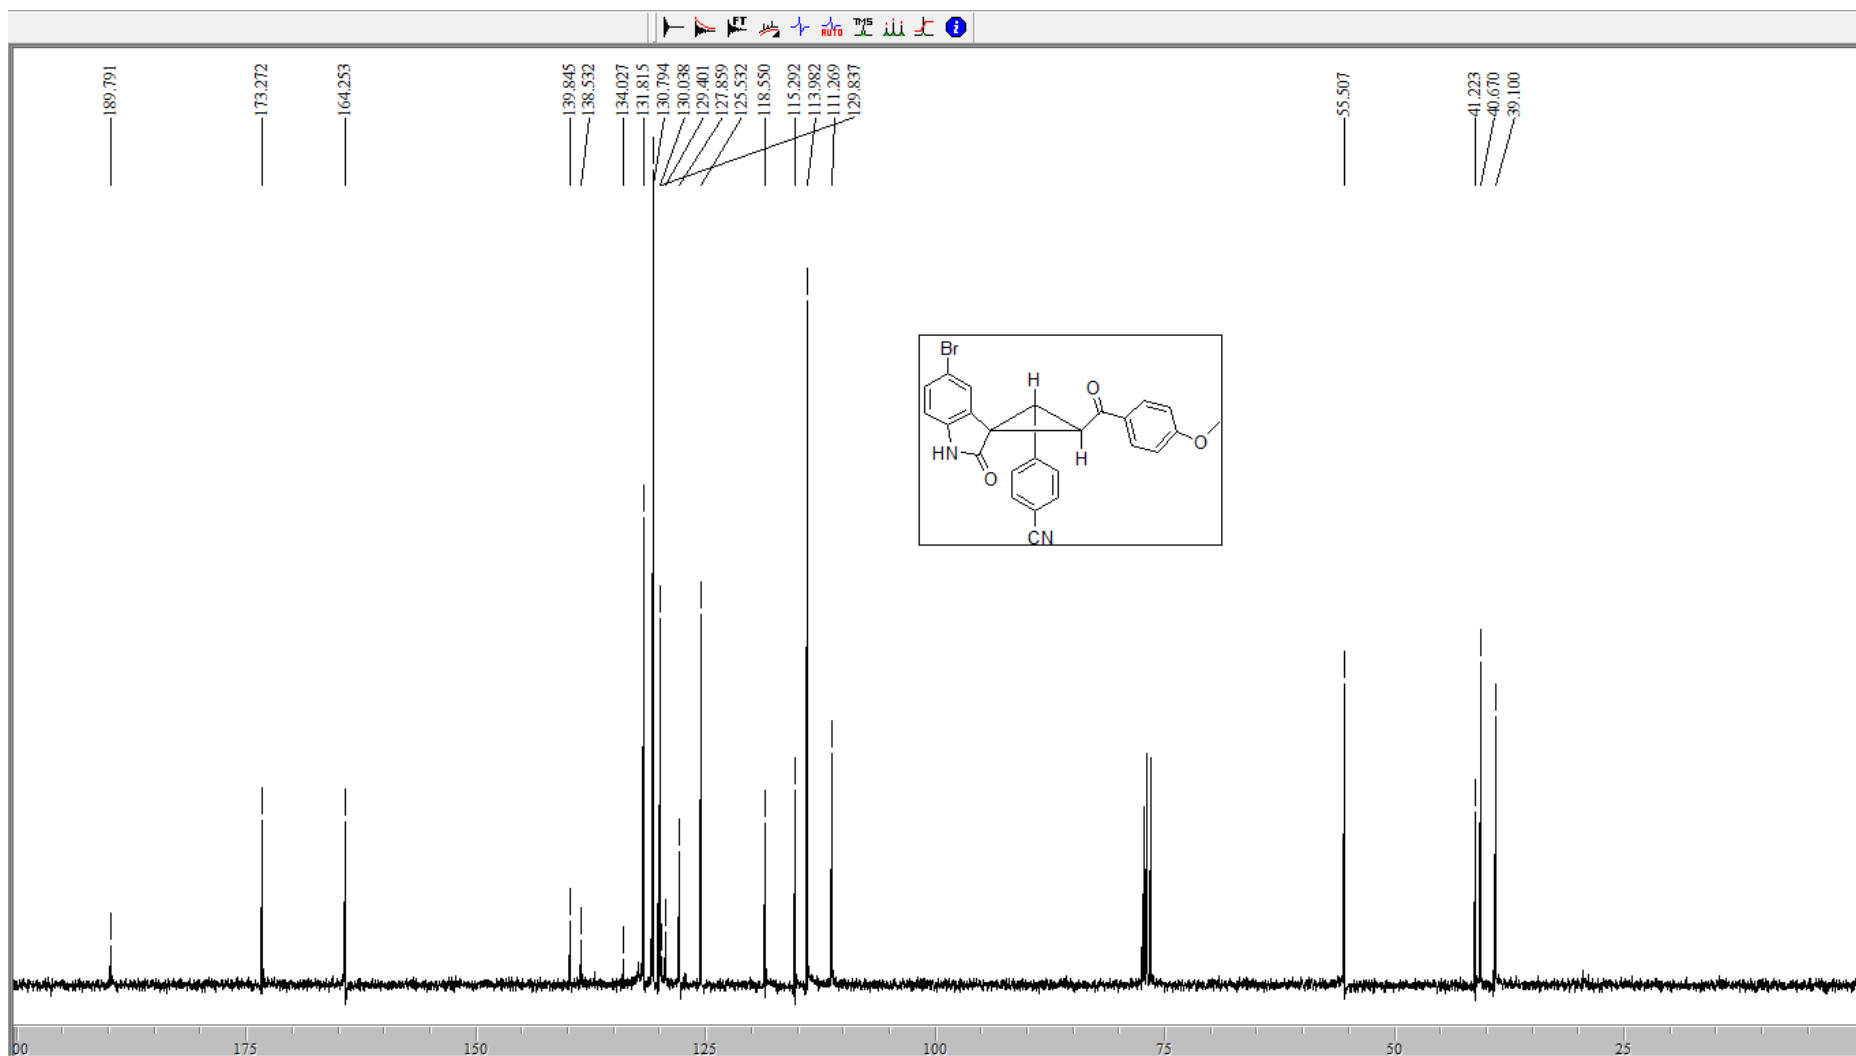

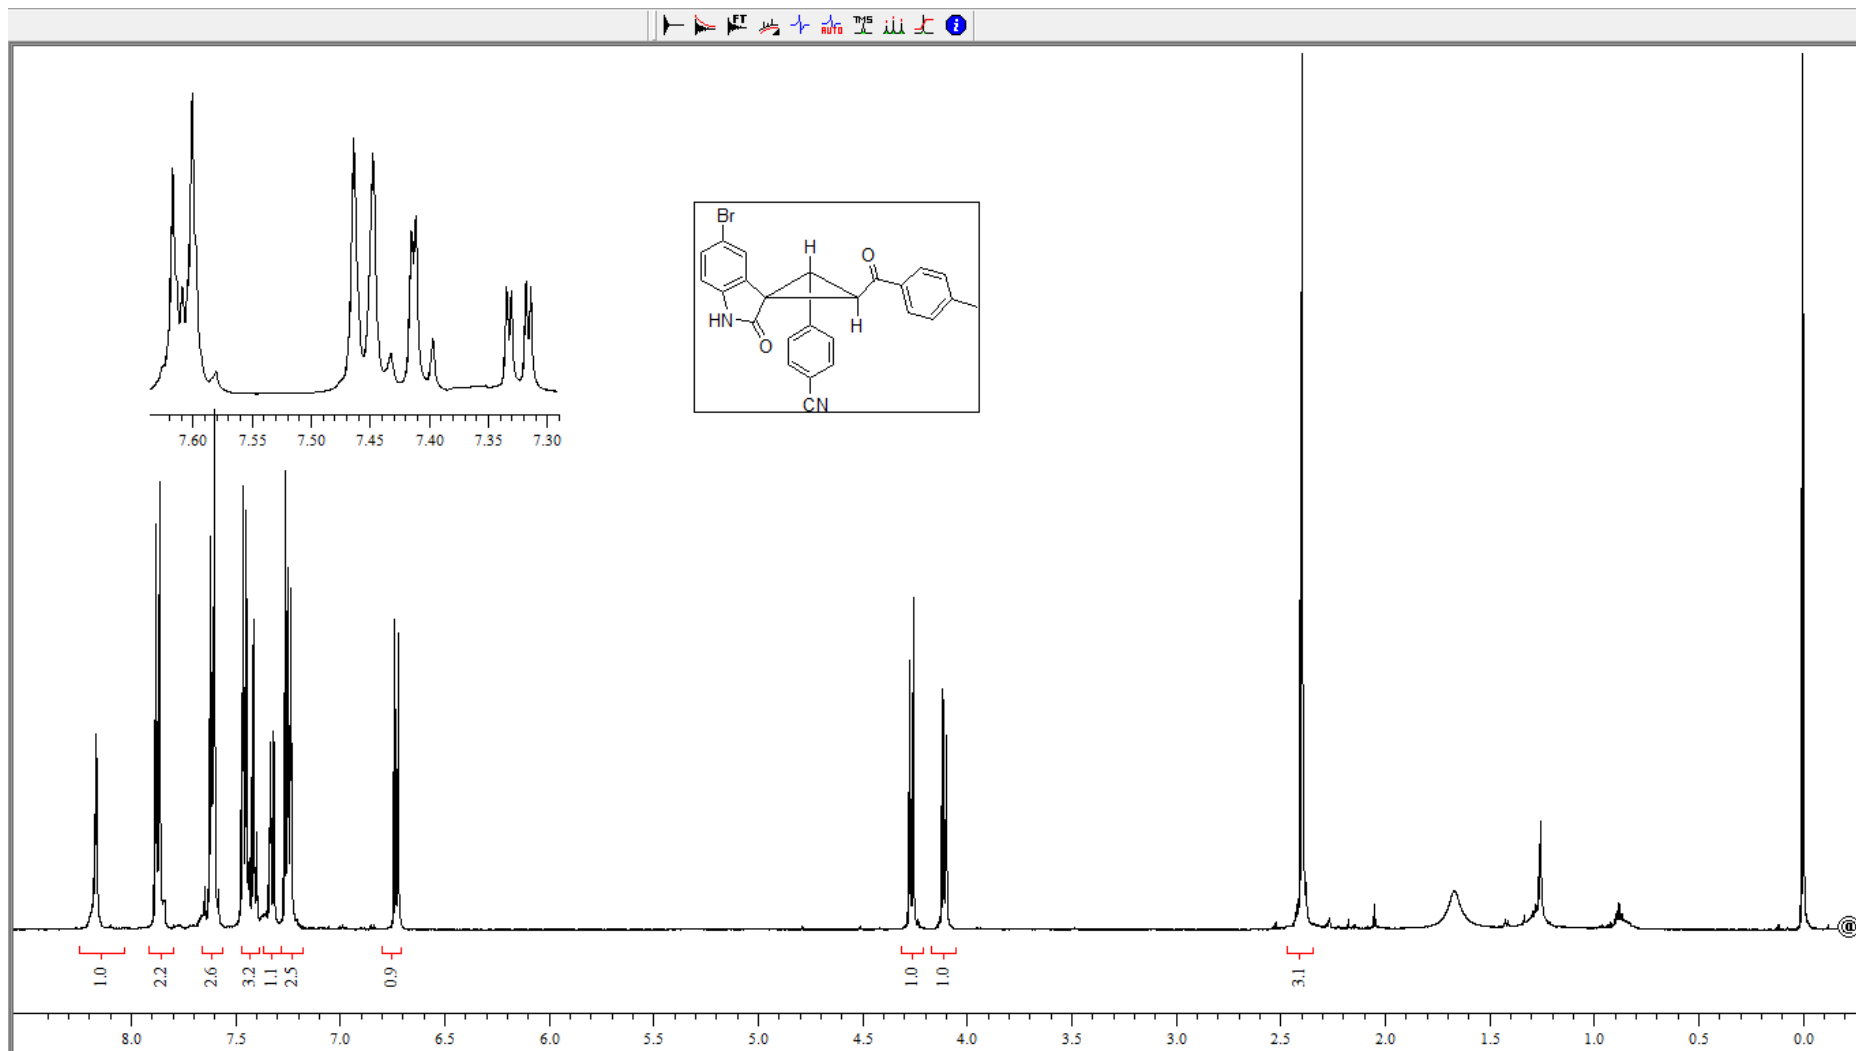



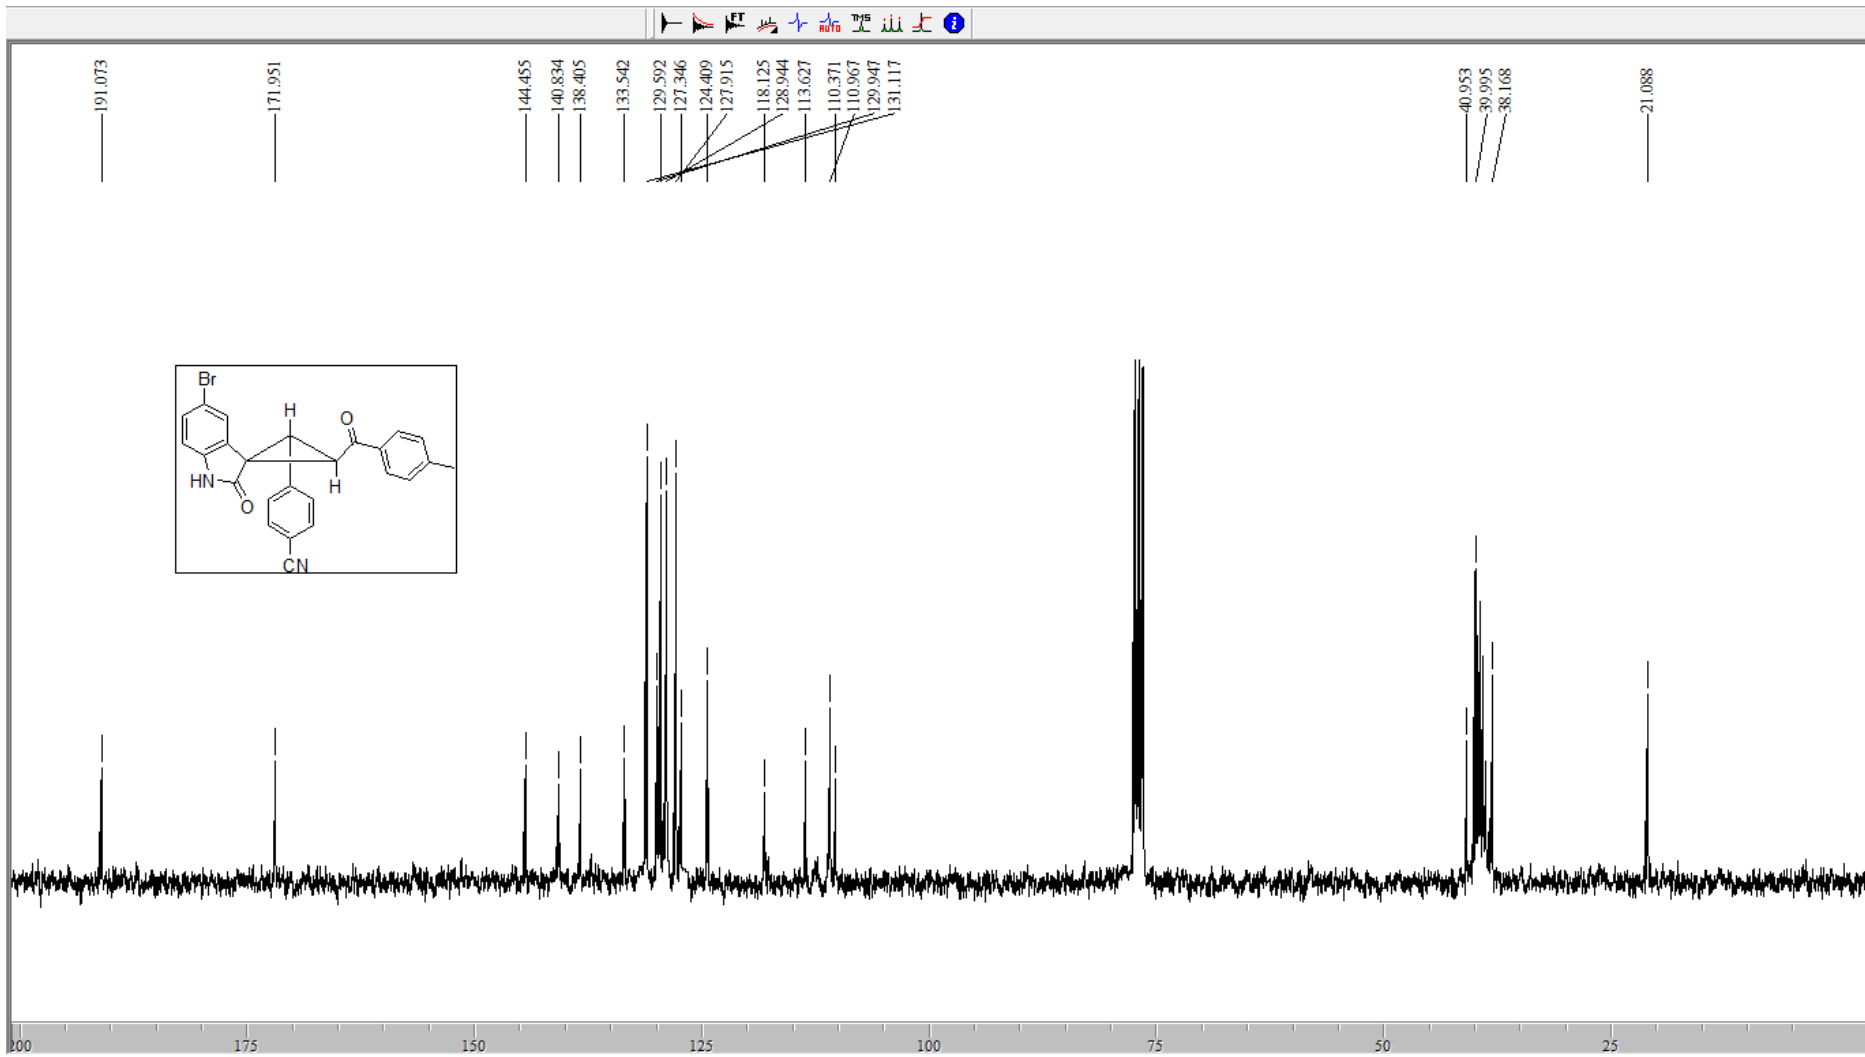

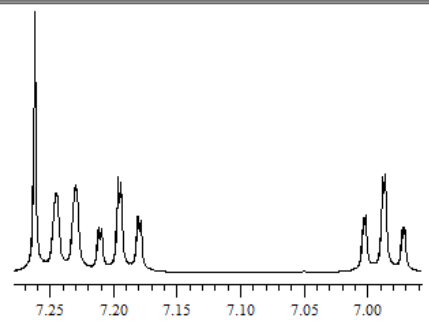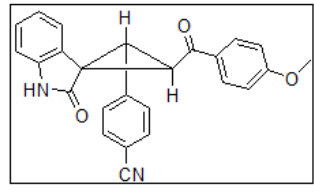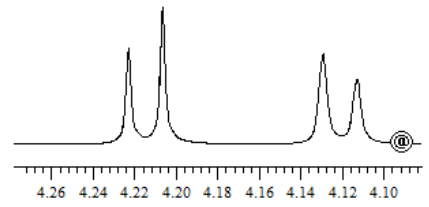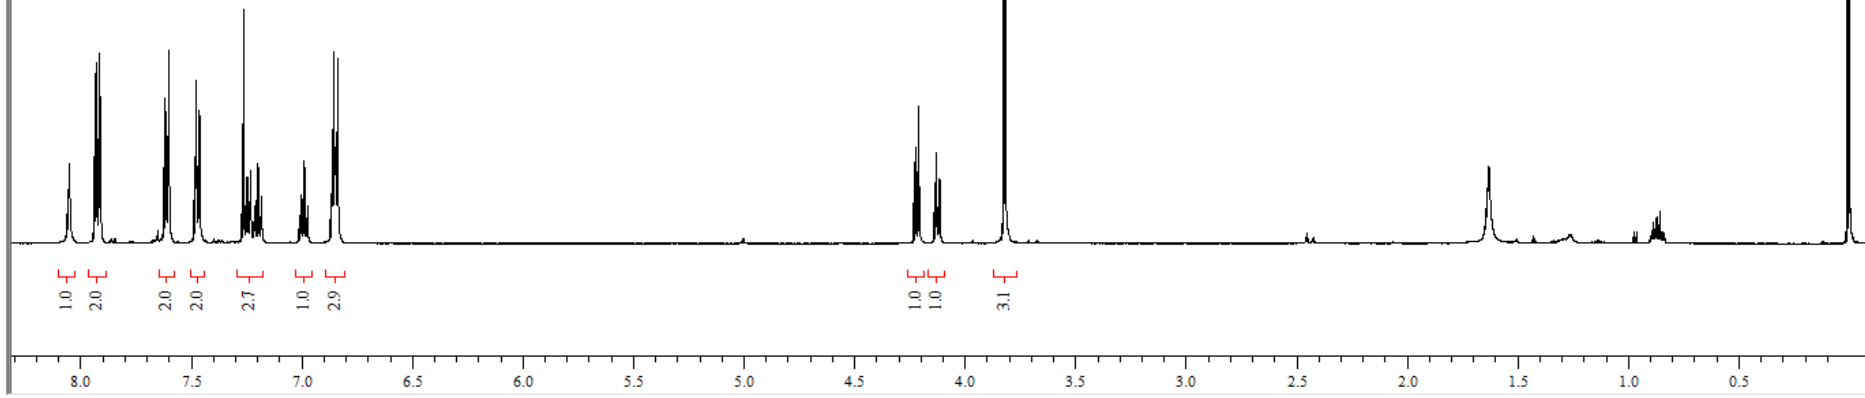

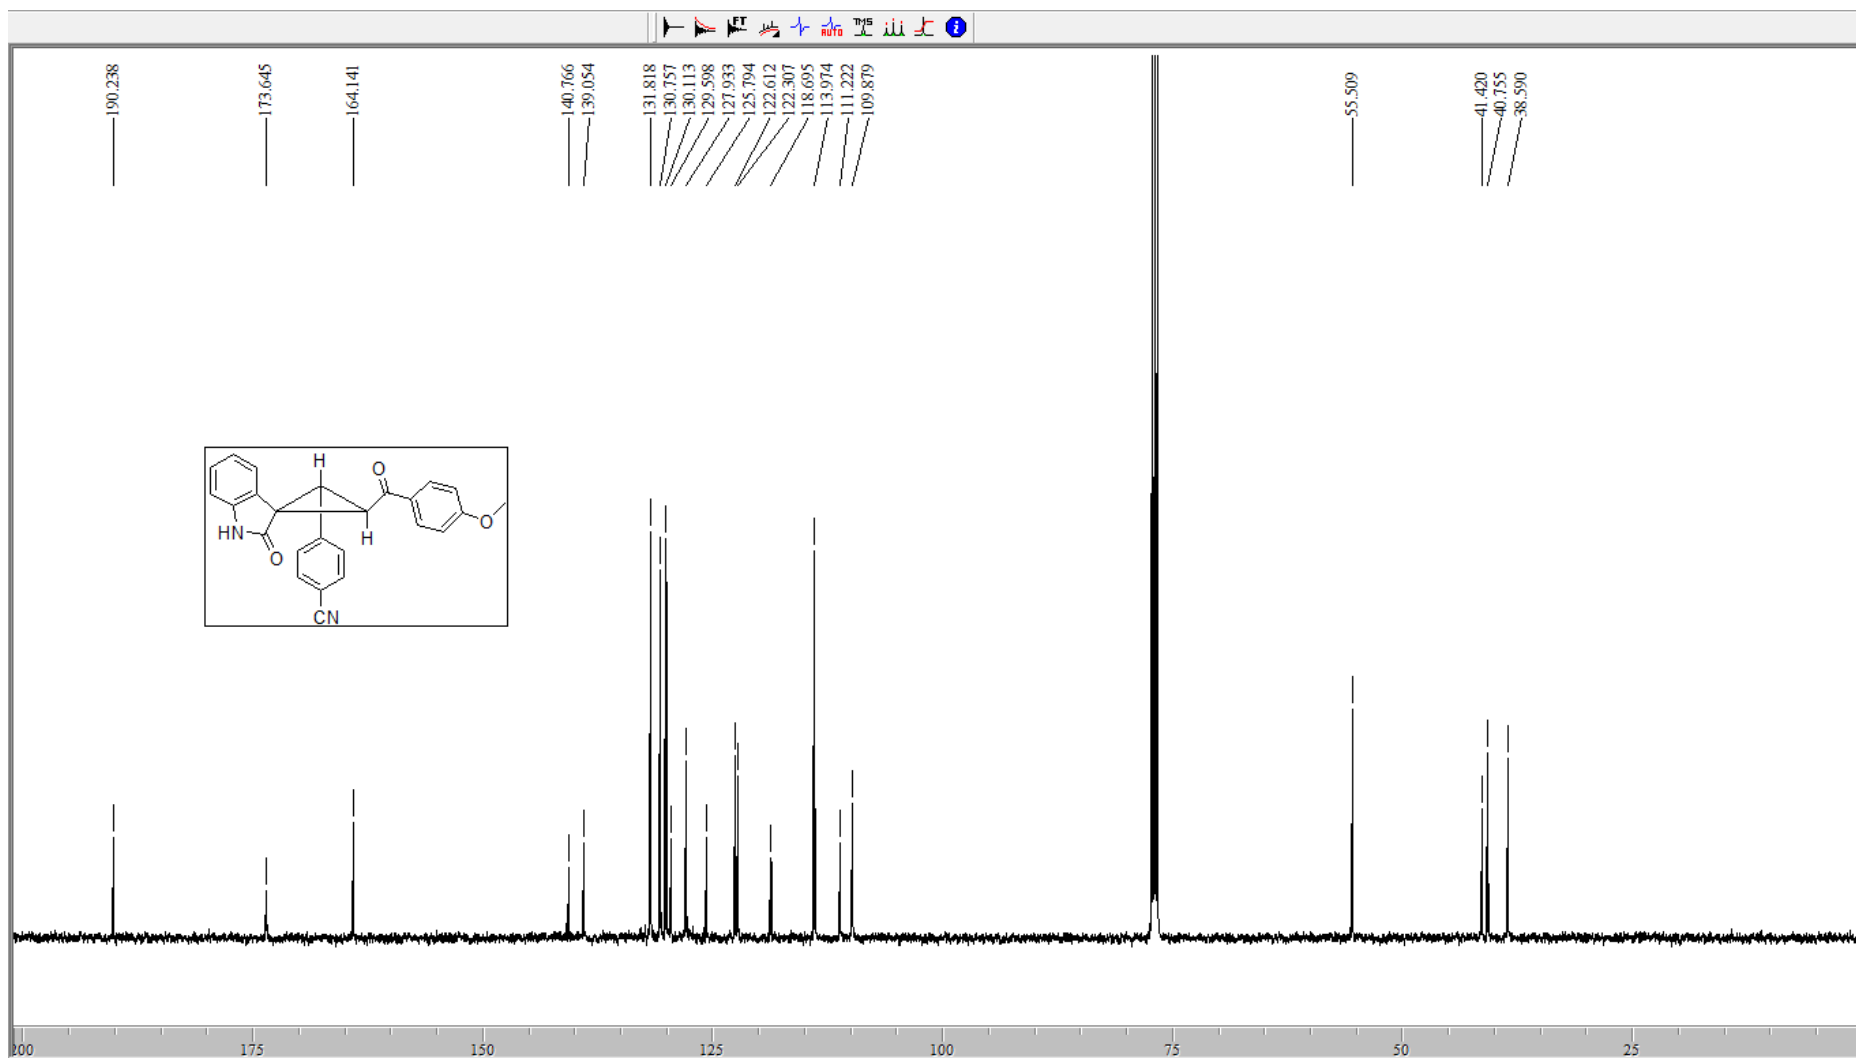

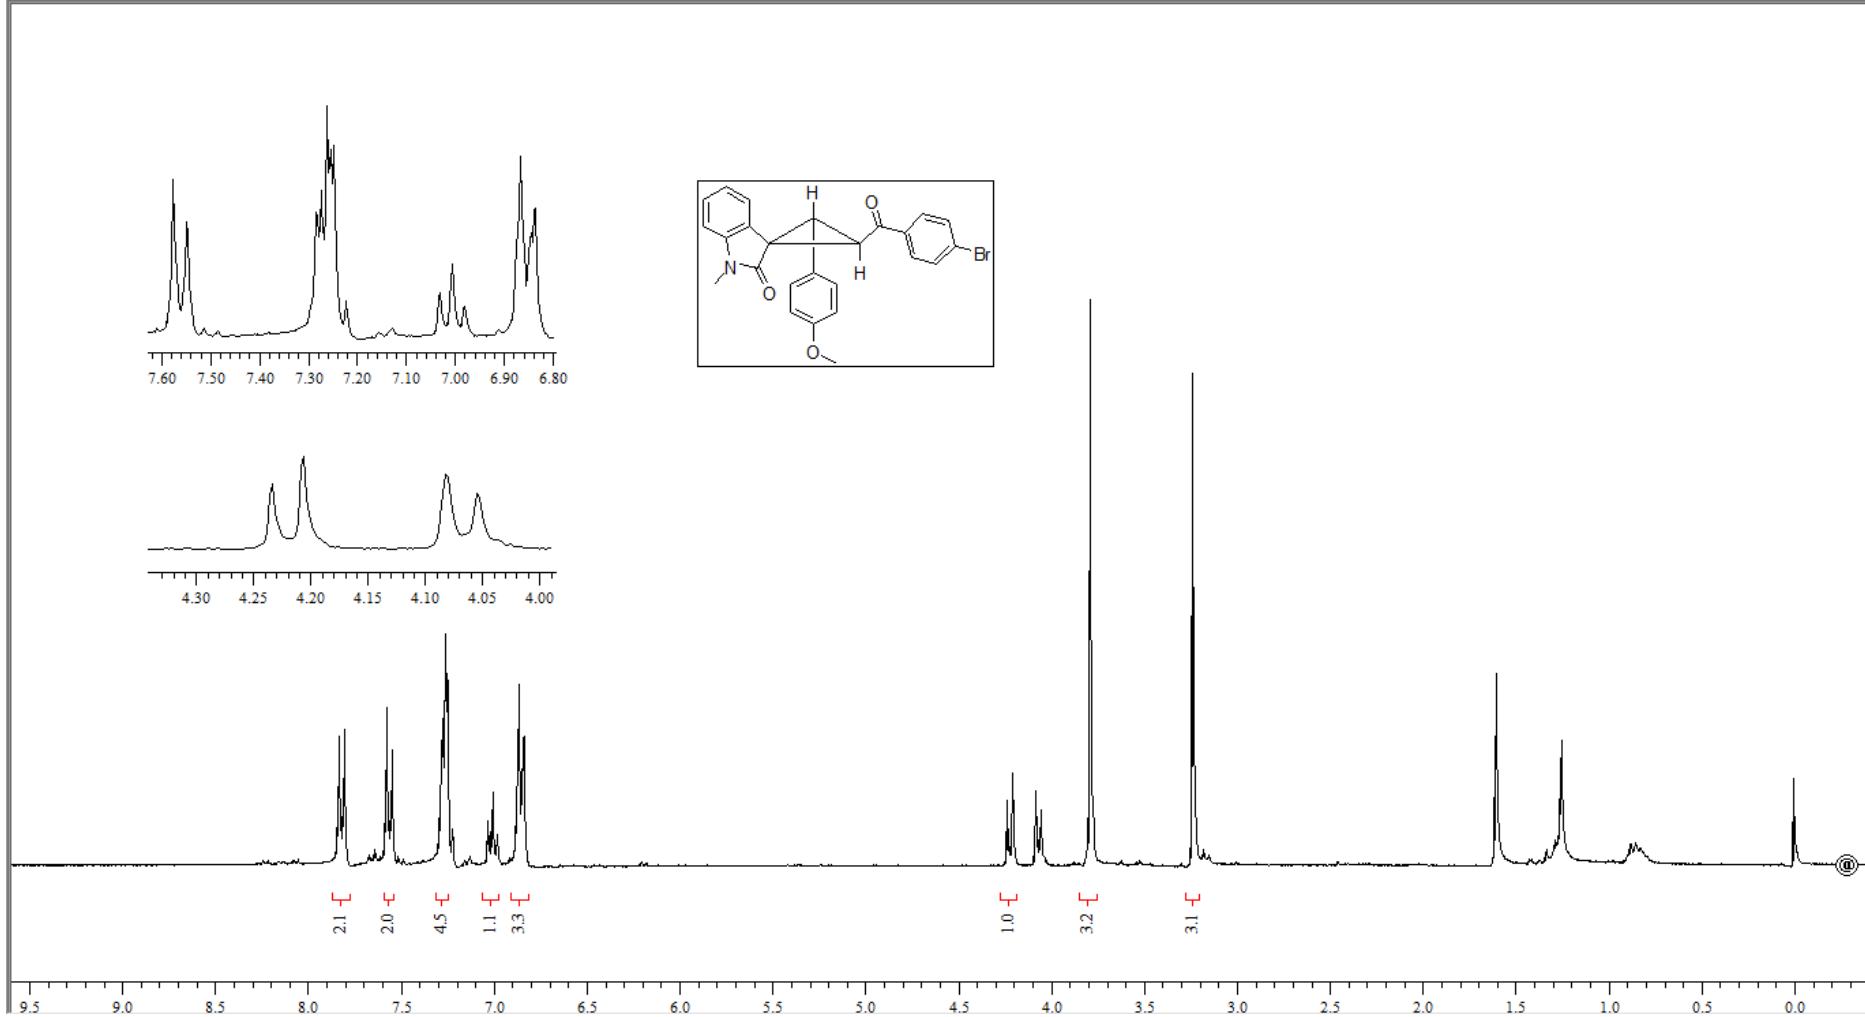

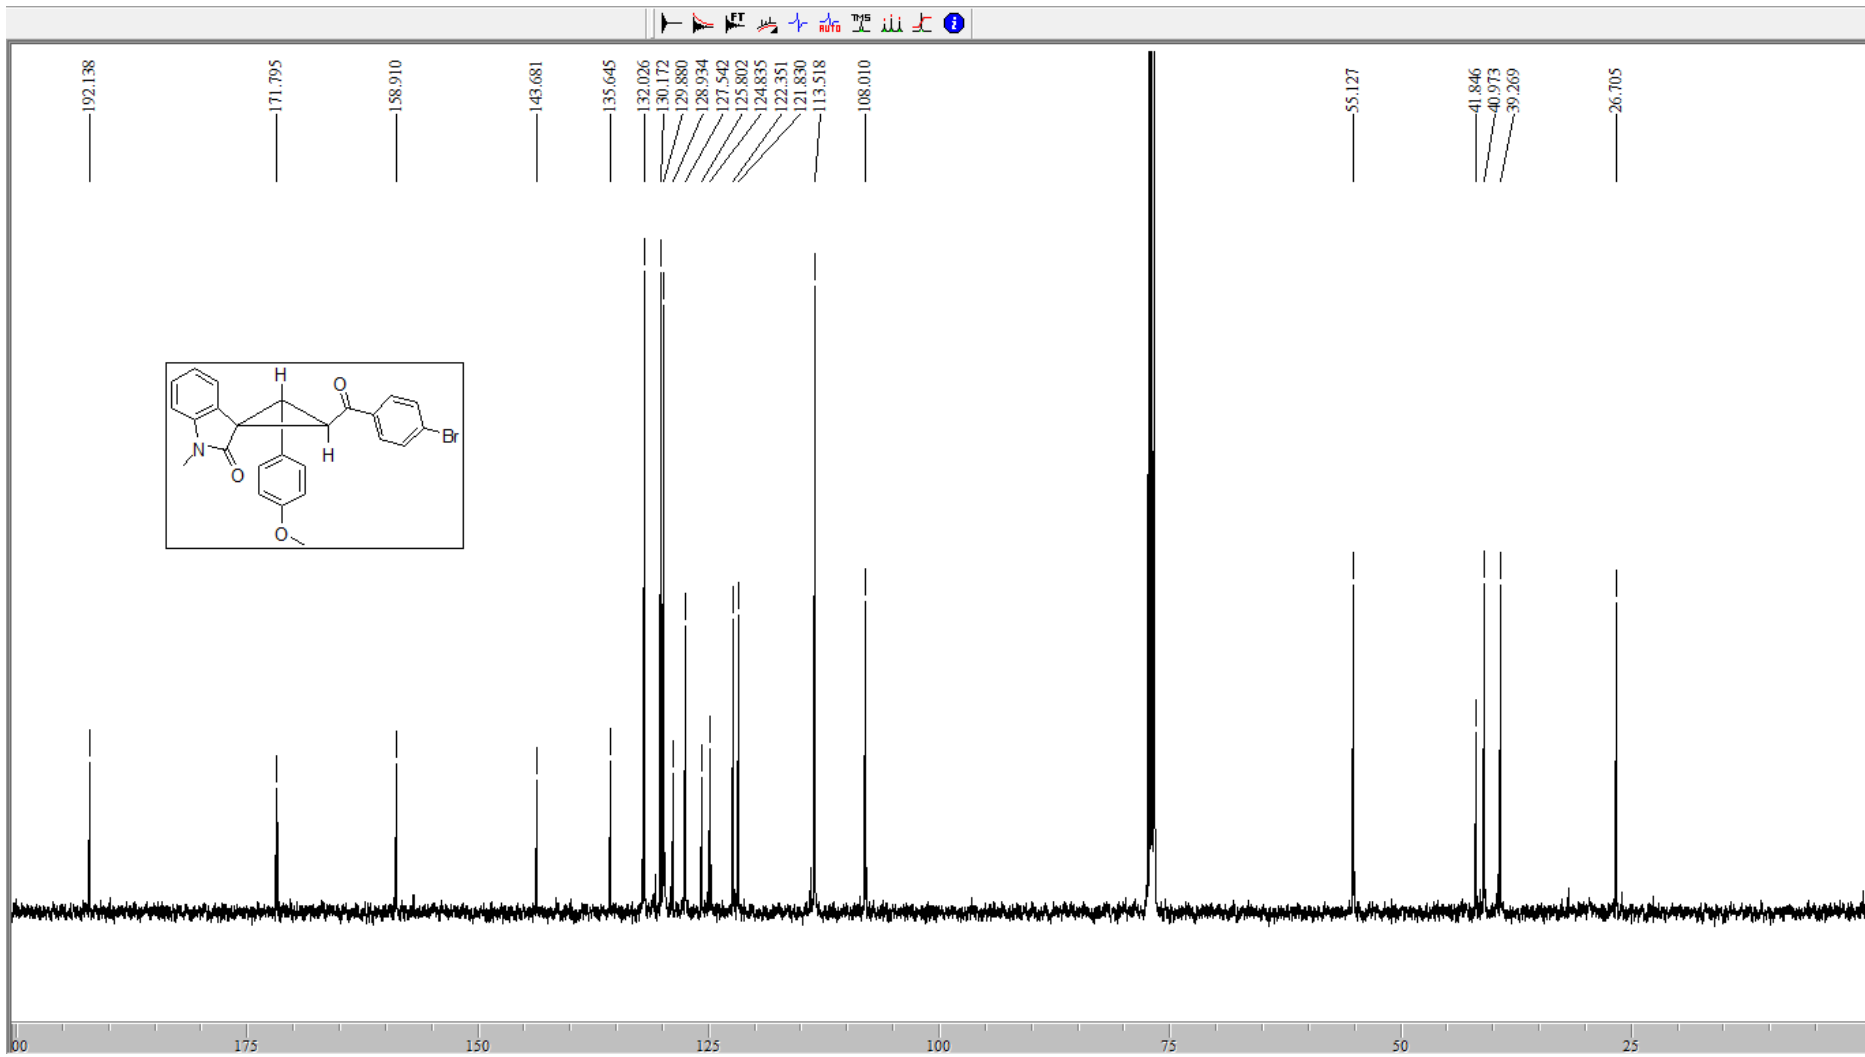

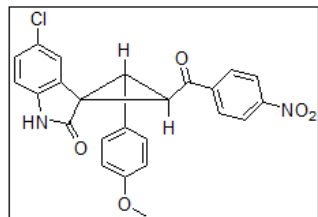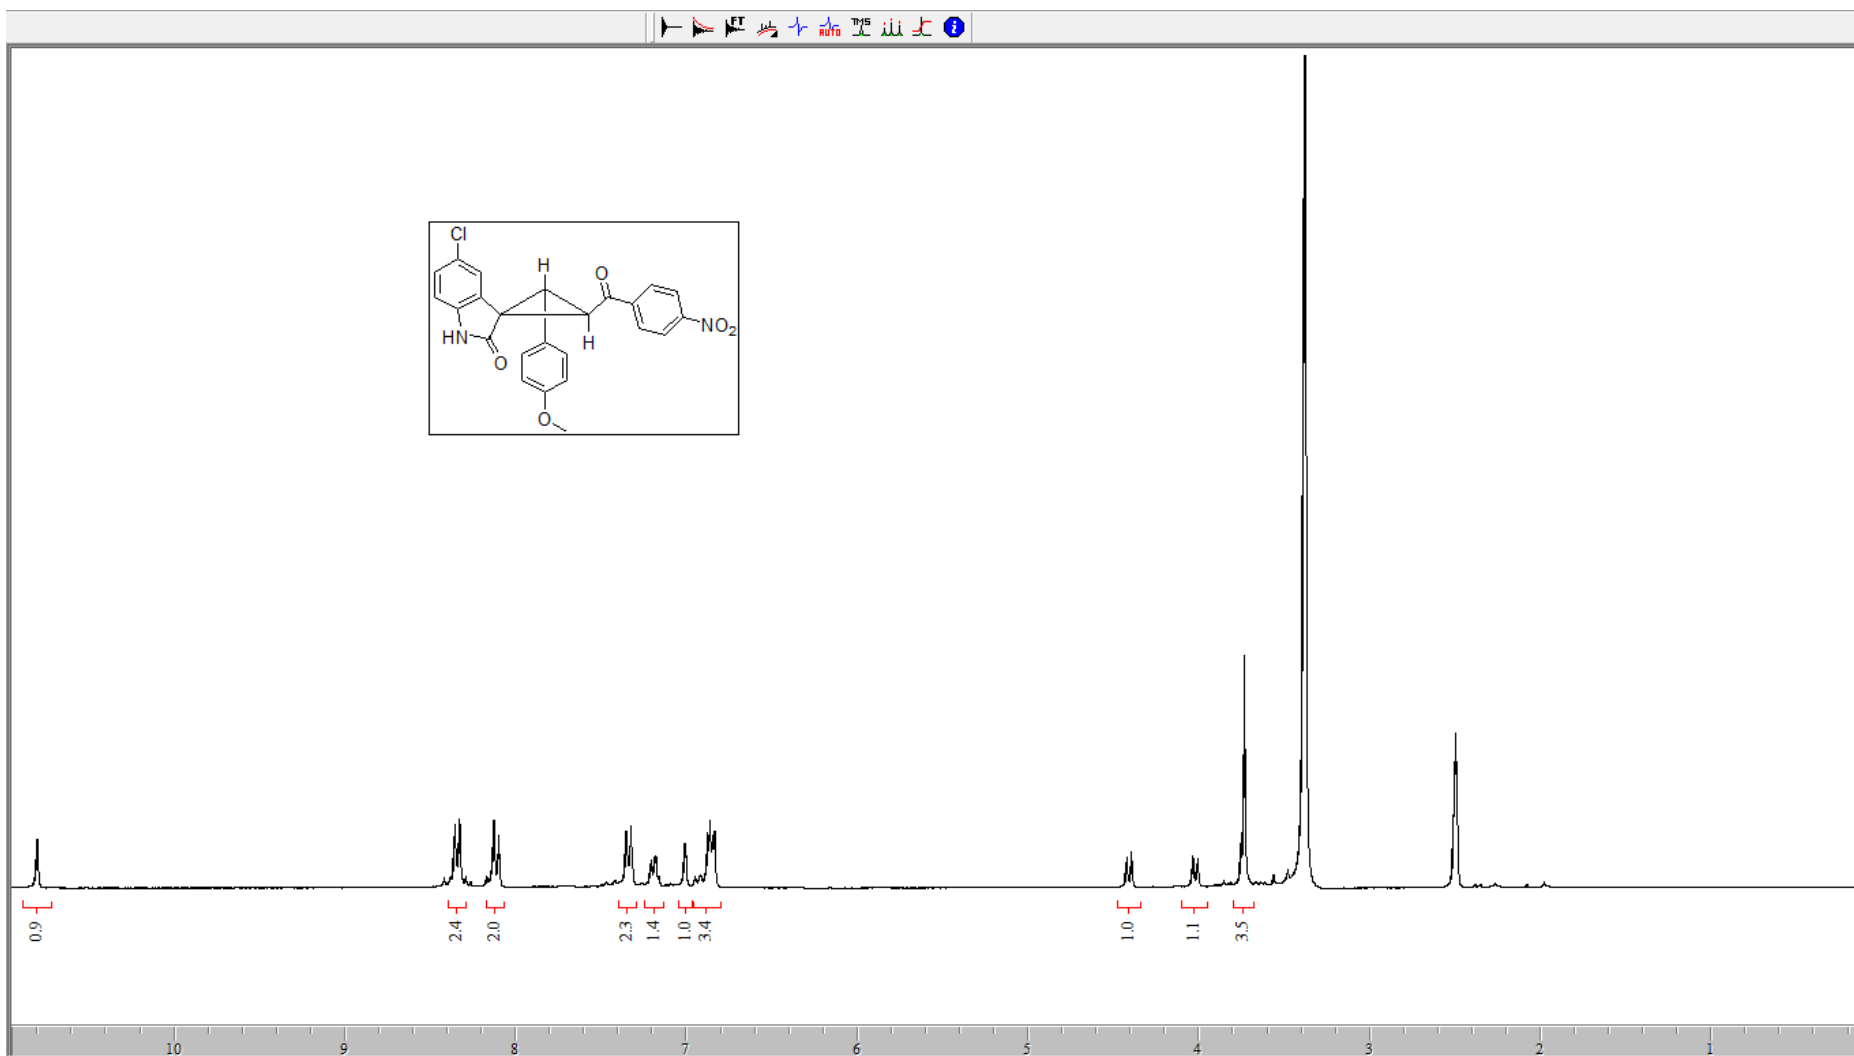

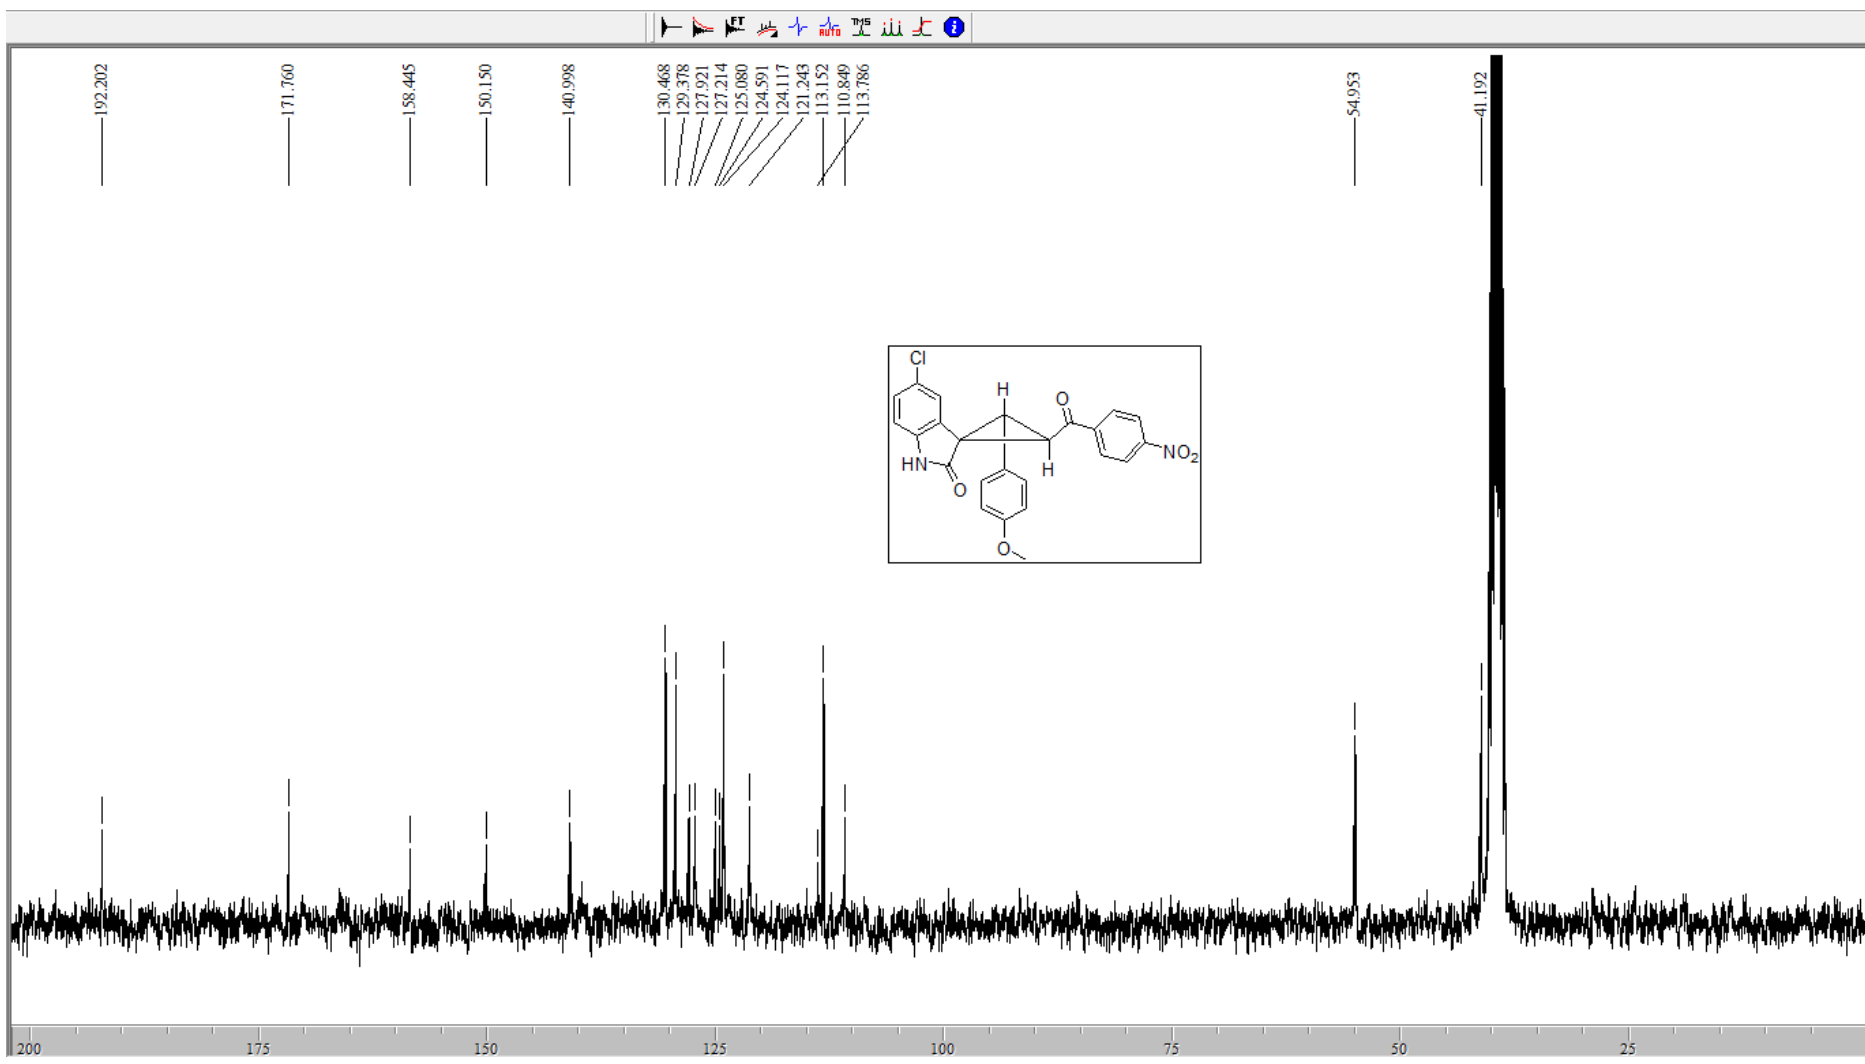

Supplement: c4ra05755d1.pdf [file c4ra05755d1.pdf]
